# Supplementary material for: Objects of temporary contraception: an exploratory study of women's perspectives in Karachi, Pakistan
Source: PubMed Central journal article supplement — BMJ Open. 2013 Aug 1;3(8):e003279. doi: 10.1136/bmjopen-2013-003279 (PMC3733316; doi:10.1136/bmjopen-2013-003279), 2013-08-01
Supplement: bmjopen-2013-003279.draft_revisions.pdf [file bmjopen-2013-003279.draft_revisions.pdf]

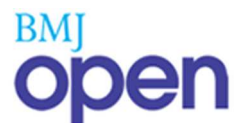

**Objects of temporary contraception: an exploratory study of women's perspectives in Karachi, Pakistan**

|                                 |                                                                                                                                                                                                                      |
|---------------------------------|----------------------------------------------------------------------------------------------------------------------------------------------------------------------------------------------------------------------|
| Journal:                        | <i>BMJ Open</i>                                                                                                                                                                                                      |
| Manuscript ID:                  | bmjopen-2013-003279                                                                                                                                                                                                  |
| Article Type:                   | Research                                                                                                                                                                                                             |
| Date Submitted by the Author:   | 22-May-2013                                                                                                                                                                                                          |
| Complete List of Authors:       | Marvi, Kamyla; Institute of International Education, Karachi, Leadership Development for Mobilising Reproductive Health (LDM)<br>Howard, Natasha; London School of Hygiene & Trop Med, Global Health and Development |
| <b>Primary Subject Heading</b>: | Qualitative research                                                                                                                                                                                                 |
| Secondary Subject Heading:      | Sexual health                                                                                                                                                                                                        |
| Keywords:                       | QUALITATIVE RESEARCH, PUBLIC HEALTH, REPRODUCTIVE MEDICINE                                                                                                                                                           |
|                                 |                                                                                                                                                                                                                      |

SCHOLARONE™  
Manuscripts

1 **OBJECTS OF TEMPORARY CONTRACEPTION: AN EXPLORATORY STUDY OF WOMEN'S**  
2 **PERSPECTIVES IN KARACHI, PAKISTAN**  
3  
4

5 Kamyla Marvi<sup>1</sup> and Natasha Howard<sup>2</sup>  
6  
7

8 <sup>1</sup> Leadership Development for Mobilising Reproductive Health (LDM), Institute of International  
9 Education, Karachi, Pakistan; [kamyla.marvi@gmail.com](mailto:kamyla.marvi@gmail.com)  
10

11 <sup>2</sup> Department of Global Health and Development, London School of Hygiene and Tropical Medicine  
12 (LSHTM), London, UK  
13  
14

15 **Correspondence to**

16 Natasha Howard, Department of Global Health and Development, Faculty of Public Health and Policy,  
17 LSHTM, 15-17 Tavistock Place, London, WC1H 9SH; T: +44 (0)2079272144; F: +44 (0)207436 5389; E:  
18 [natasha.howard@lshtm.ac.uk](mailto:natasha.howard@lshtm.ac.uk)  
19  
20  
21  
22

23 **Key words**

24 Family planning, qualitative research, traditional medicine, Pakistan  
25  
26  
27

28 **Word count:** 3,824  
29  
30  
31  
32  
33  
34  
35  
36  
37  
38  
39  
40  
41  
42  
43  
44  
45  
46  
47  
48  
49  
50  
51  
52  
53  
54  
55  
56  
57  
58  
59  
60

**ABSTRACT****Objective**

To explore perspectives of three modern contraceptive objects, using an *emic* approach, among women in Shah Faisal Colony, a low-income community in Karachi, Pakistan.

**Methods**

In-depth face-to-face interviews of non-users (n=5), injection users (n=7), pill users (n=4), and IUD users (n=4) were conducted in 2011. Qualitative content analysis with an inductive approach and manual thematic coding was used to analyse data.

**Results**

Awareness of family planning was high. Women described different therapeutic approaches, stating they generally preferred modern medicine for contraception as it was fastest and most powerful. They reported that fear of some contraceptive objects, particularly injections and IUDs, influenced their choices. Women explained their perceptions of how the heating effects of contraceptives could cause unwanted side-effects including menstrual irregularities, weight gain, and weakness, leading to disease.

**Conclusions**

Most women wanted family planning, but remained dissatisfied with available contraceptives and their effects. While women reported that they relied on modern medicine for contraception, their descriptions of how contraceptives affected their health relied on the hot-cold explanatory idiom of traditional medicine.

**Article focus**

- To explore women's understanding and interpretations of three modern contraceptives.

**Key messages**

- Women were knowledgeable about family planning and relied on modern contraceptives.
- Contraceptive potency and effects were interpreted using the hot-cold idiom of traditional medicine.
- Consideration of women's interpretive idioms could help providers improve health messages and family planning counselling.

**Study strengths and limitations**

- Use of qualitative methods provided rich insight into women's interpretations and decision-making regarding contraceptives.
- Available time and funding constrained the sample size, limiting inclusion of a potentially broader range of perspectives.

## INTRODUCTION

Pakistan, the world's sixth most populous country, has an estimated population of 176 million.[1 2] Annual population growth of 2.1% resulted in the population quadrupling in the past fifty years with 41% below age fifteen.[1 3] Potential reasons are both demand-side (e.g. female autonomy, religious beliefs, son preference [4-7]) and supply-side (e.g. cost, poor distribution, and limited coverage of contraceptives [8-10]). A rise in political and religious extremism since the dictatorship of Zia ul Haq (1977-88), Pakistan's subsequent involvement in the international 'war on terror,' and inadequate governance (e.g. corruption, weak infrastructure, violence) have weakened the economy, worsening social indicators. High population growth strains Pakistan's limited resources, affecting health indicators. For example, with reproductive-age women constituting almost one-quarter of Pakistan's total population, a low contraceptive prevalence rate (CPR) of 29.6%, with much lower rates among poor and rural populations, contributes to a high maternal mortality ratio of 260/100,000 - mostly preventable haemorrhage, eclampsia, and sepsis.[1 5 11 12]

Pakistan has had a population programme since the 1960s and family planning awareness is nearly universal, with 96% of women surveyed identifying at least one modern contraceptive method.[1 13] While modern contraceptives comprise 73% of Pakistan's CPR, temporary methods allowing birth spacing (e.g. pills, IUDs, injectables, implants, condoms) comprise 13.6% of current usage, of which half (6.8%) are condoms.[1] Thus, only a small proportion of Pakistani couples use temporary methods with evidence suggesting a significant unmet need for contraception (Table 1).[1 14 15]

**Table 1** Method usage among married women aged 15-49 in Pakistan

| Method                                              | Description                                                                                                                                                                                                                                             | Application                           | Usage | Ever used |
|-----------------------------------------------------|---------------------------------------------------------------------------------------------------------------------------------------------------------------------------------------------------------------------------------------------------------|---------------------------------------|-------|-----------|
| Hormonal pill                                       | A birth control method including a combination of oestrogen and progestogen.                                                                                                                                                                            | Taken by mouth daily                  | 2.1%  | 12.2%     |
| Injectable contraceptive (e.g. 1, 2, 3-month doses) | Hormones, which stop women ovulating, thicken cervical mucus (making it difficult for sperm to get through) and thin the lining of the womb (making it difficult for ova to attach to the lining).                                                      | Injected into a muscle (e.g. buttock) | 2.3%  | 11.1%     |
| Intra-uterine contraceptive device (IUD)            | The copper IUD (more common in Pakistan) works by negatively affecting sperm mobility and preventing their joining with an egg. Additionally, the foreign body inside the uterus irritates the lining and wall making it hard for an embryo to implant. | Inserted into uterus                  | 2.3%  | 8%        |

Source: [1]

Pakistan is a predominantly Muslim society with formal, informal, and popular healthcare approaches coexisting. Pakistan's formal medical system includes modern (i.e. Western) medicine, westernised homeopathy, and traditional *hikmat*. *Hikmat* or *unani tibb* is traditional Greco-Arab medicine, widely practiced in Pakistan, with similarities to Indian *Ayurvedic* medicine. Modern medicine is the most common approach in urban settings and government facilities, but overlaps with traditional and folk approaches.[16 17] Shaikh and colleagues found health providers often presented false qualifications or interpreted modern medicine to suit patient beliefs.[16] While contraceptives are modern medicine, popular perceptions and

1 practices are influenced by religion and other therapeutic approaches.[11 17] Nichter noted that multiple  
2 therapy systems coexist in most countries, despite the regulatory efforts of government or vested interests of  
3 dominant therapy systems.[18] Kleinman classified the professional, traditional, and popular as three  
4 overlapping systems, while Nichter found providers underappreciated the ways popular ideas about medicine  
5 influenced healthcare seeking and compliance.[18-20]  
6  
7

8  
9  
10 Women's perceptions of contraceptives significantly influence their decisions to start or continue family  
11 planning in Pakistan, supporting recent global discourse on influences of side-effects on usage.[21-25] Bhatti  
12 and colleagues found 12.1% of non-users cited method-related reasons, including fear of side-effects and  
13 interference with normal bodily processes.[1 26] Sultana and colleagues found a 29% discontinuation rate for  
14 female methods in Punjab was primarily due to side-effects, as contraceptive users associated all subsequent  
15 health problems (e.g. obesity, body aches, high blood pressure, nausea, irregular bleeding, infertility) with  
16 contraceptive usage.[23]  
17  
18  
19

20  
21  
22 Most studies approach contraceptive behaviour from medical or behavioural perspectives, with minimal  
23 consideration of the contraceptive objects used.[27] Such approaches can result in women's perspectives  
24 being minimised as misconceptions.[28 29] Little research has explored the explanatory models Pakistani  
25 women apply to their contraceptive beliefs.[28] The term 'misconception' already implies these beliefs are  
26 flawed, and that the alternative medical model provides the correct explanation. However, these beliefs are  
27 entrenched in age-old belief systems and experiences that are real and personal to women and those around  
28 them. Nishtar found these beliefs to be based on societal perceptions, which women considered must have  
29 some basis in truth to be so widespread.[28] Multiple sources of perception create the basis on which each  
30 woman makes decisions.[30] The objects used for temporary contraception have their own potency to affect  
31 the body's functioning, perceptions of which influence usage decisions (e.g. whether, which, how long?).  
32 Little *emic* data, showing behaviour or beliefs in culturally meaningful terms, connects popular perceptions  
33 of contraception to usage.[31 32]  
34  
35  
36  
37  
38  
39  
40  
41

42 This study examined perceptions of modern contraceptive objects, using an *emic* perspective, among women  
43 in a low-income community of Karachi, Pakistan.[33] The research question was 'What are these women's  
44 beliefs about contraceptive objects and do those beliefs affect usage decisions?' It contributes to the literature  
45 on unmet need by describing how popular perceptions affect usage. Study objectives were to:  
46  
47

- 48 • describe women's perceptions of three temporary contraceptives as objects (i.e. injections, pills, IUDs);
- 49 • consider how women's perceptions of contraceptive usage and potency within their own therapeutic  
50 paradigms affected usage decisions.  
51  
52

## 53 METHODS

54  
55  
56  
57 Ethics approval was granted by the LSHTM research ethics committee in the United Kingdom and the  
58 Institutional Review Board of Interactive Research and Development in Pakistan.  
59  
60

1  
2 With approximately 18 million inhabitants, Karachi is the commercial, industrial and financial hub of  
3 Pakistan (Figure 1).[34] Shah Faisal Colony (Figure 2), with a population of over 335,000, has experienced  
4 violent civil clashes. It was chosen for its ethnic diversity and low socioeconomic level. A local non-  
5 governmental organisation, Rana Liaquat Craftsman Colony (RLCC), provided a community entry point,  
6 facilitating access with women. RLCC has provided basic clinic services in Shah Faisal Colony since 1954,  
7 providing services to approximately 5,400 families.  
8  
9  
10

11  
12 In-depth face-to-face interviews were chosen to explore women's experiences and perceptions. Twenty  
13 participants were purposively sampled, for diversity of opinion, from non-menopausal married women over  
14 age 20, living in Shah Faisal Colony, Karachi, aiming for:  
15  
16

- 17 • 5 non-users of contraception;
  - 18 • 5 injectable contraceptive users (1, 2 or 3-month dosage);
  - 19 • 5 oral pill users;
  - 20 • 5 IUD users.
- 21  
22  
23  
24

25 Participants were recruited by RLCC outreach workers, trained for one day in qualitative recruitment  
26 methods, who distributed study information sheets and obtained written informed consent from all potential  
27 participants. The lead author was responsible for final participant selection and conducting interviews in a  
28 private room at the RLCC health centre. Two pilot interviews were conducted to finalise the interview guide.  
29 The guide ensured themes of interest were covered, though interviews were conducted as loosely guided  
30 conversations to allow women control in defining topics. Interviews were digitally recorded with participant  
31 permission and took approximately one hour. Recordings were given a pseudonym to ensure confidentiality,  
32 which was also recorded on the consent form and kept in a locked file. Observations were recorded for each  
33 interview.  
34  
35  
36  
37  
38  
39

40 Interviews were transcribed in Urdu, translated into English, and typed into Microsoft Word by a  
41 professional transcriptionist and translator familiar with reproductive health terminology. Translations were  
42 checked by the interviewer, and participants where possible, to ensure accuracy. Transcripts were labelled by  
43 pseudonym and numbered by page and line.  
44  
45  
46  
47

48 Following principles of interpretive social research, the interviewer conducted initial analysis to increase  
49 interpretability and deepen understanding of social and emotional context.[35] Qualitative content analysis  
50 with manual thematic coding was used, with an inductive approach to building non-hierarchical themes and  
51 identifying meaning.[36] Consensus was reached between authors on differences found. Data was  
52 triangulated by comparing responses to similar questions in different transcript sections.  
53  
54  
55  
56

## 57 FINDINGS

58  
59  
60

Twenty-one interviews were conducted. One, unrecorded, was excluded. Of 20 participants (Table 2), six were illiterate and others educated to secondary level, with two completing matriculation after grade 10 and five completing intermediate certification after grade 12. Most (i.e. 13 women) were housewives, three did piecework embroidery at home, and a few had outside jobs (e.g. domestic work, teaching, one actress). Half of husbands (i.e. 11) worked in low-income jobs (e.g. street merchants), six were semi-skilled or skilled labourers (e.g. electrician, driver, barber), while two husbands were unemployed. Women were of various ethnicities, including three Pathans, five Muhajir, and seven Punjabis. All were Muslim and most had resided in the area since childhood or marriage. Participants averaged 31 years old (25-45 years), were married and still menstruating. Non-users were on average 10 years older than contraceptive users (38 versus 28). All had children, ranging from seven months to 25 years old. Participants had an average of three children each (range 1-10). Non-users had fewer male children on average, at 0.80 male and 2.6 female versus 1.5 male and 1.6 female for contraceptive users. Of the fifteen contraceptive users, seven used injectable contraceptives, four used contraceptive pills, and four used an IUD. Thirteen contraceptive users cited the expense of raising children as their primary reason for birth spacing, while two cited previous pregnancy complications.

**Table 2** Participant demographics, ordered by contraceptive usage and age

| Pseudonym   | Usage               | Age   | Education     | Origin  | Children |   |
|-------------|---------------------|-------|---------------|---------|----------|---|
|             |                     |       |               |         | M        | F |
| Ayesha      | Non User            |       | Grade 9       | Haripur | 2        | 1 |
| Nadira      | Non User            | 31    | Intermediate  | Pindi   | 0        | 2 |
| Kaukab      | Non User (pregnant) | 37    | Grade 5       | Abbasi  | 0        | 4 |
| Rashida     | Non User            | 40    | Grade 9       | -       | 0        | 5 |
| Aziza       | Non User            | 45    | Matriculation | Muhajir | 2        | 1 |
| Karima      | Injection           | 25    | Grade 8       | Punjabi | 1        | 0 |
| Sofia       | Injection           | 25-26 | Grade 8       | -       | 1        | 2 |
| Farida Bibi | Injection           | 28    | Intermediate  | -       | 1        | 0 |
| Rehmat      | Injection           | 28    | Intermediate  | Muhajir | 2        | 0 |
| Talat       | Injection           | 28    | Illiterate    | Punjabi | 0        | 4 |
| Gul Zehra   | Injection           | 33    | Illiterate    | Pathan  | 2        | 8 |
| Nasreen     | Injection           | 35    | Matriculation | Punjabi | 2        | 1 |
| Misbah      | Pills               |       | Illiterate    | Pathan  | 1        | 1 |
| Qamar       | Pills               | 23    | Grade 8       | Punjabi | 1        | 1 |
| Pari        | Pills               | 28    | Illiterate    | Punjabi | 2        | 2 |
| Insiya      | Pills               | 28    | Intermediate  | -       | 2        | 1 |
| Shazia      | IUD                 |       | Illiterate    | Punjabi | 1        | 1 |
| Mariam      | IUD                 | <30   | Illiterate    | Pathan  | 1        | 2 |
| Shaista     | IUD                 | 30    | Intermediate  | Muhajir | 2        | 1 |
| Shehnaz     | IUD                 | 31    | Grade 8       | Muhajir | 3        | 1 |

NB: Education in Pakistan is organised into primary (grades 1-5); middle (grades 6-8); high (grades 9-10, culminating in matriculation); intermediate (grades 11-12, culminating in intermediate diploma).

Emergent themes are organised under therapeutic systems, contraceptives as objects, and potency and side-effects.

### Therapeutic systems

All women discussed multiple therapeutic systems, including doctors practicing through private and government services, lady health workers, traditional birth attendants, homeopaths, *hakeems*, and practitioners offering healing prayers.[16] Most women used home remedies and explored different systems with varying success:

*Talat: "Yes we have tried all. We have had prayers done; we have taken medicines from doctors, and hakeems too. Some are good and effective."*

*Nadira: "For example, a complete treatment for jaundice does not exist in modern medicine, which simply advises to take more water and juices; but homeopathy has the treatment for this."*

Women preferred the speed and power of modern treatments:

*Talat: "Most of the time we take medicines from doctors [because] we get relief more quickly. Children get better. Rather than taking remedies we more often take medicine from outside so that the children can be comfortable more quickly. They shouldn't suffer."*

*Rehmat: "The difference is that the homeopathic impact is very late, and allopathic, such as injections etc., has an immediate effect... A person recovers immediately."*

*Farida Bibi: "Very few people go to a Hakeem; and those that do are elderly. I mean to say, those who, because of their age are unable to use the medicines of a doctor as they are of greater power, they go to a Hakeem."*

Women used home remedies or modern services for reproductive issues. Most chose delivery in hospitals or maternity clinics, with only four reporting giving birth with the help of a *dai* or traditional birth attendant. Nineteen of twenty participants expressed eagerness to space their children. Non-users spoke of birth spacing through breast-feeding or other natural methods, with one woman using withdrawal. All women preferred modern contraceptives, and knew of no methods emerging from alternative therapy systems.

### Contraceptives as objects

Women were shown injectable contraceptives, pills, and IUDs during interviews to elicit their perceptions.

All were familiar with injections as objects, as Pakistani practitioners commonly overprescribe them.[37]

Women expressed different levels of fear, from mild to much stronger discomfort:



1 *Rehmat: "The injection hurts so much that I get shaken up, although I try to control myself. She says to leave*  
2 *the body loose, but when an injection is going inside, how I can leave it loose? My leg becomes numb. She*  
3 *says 'I don't know - this doesn't happen with anyone else, just you...'"*

4  
5  
6  
7 Some women said injections were a more powerful and faster way of delivering medicine to the body.

8 *Rehmat: "When we eat medicine, it affects after a while. Injections effect immediately, they mix with the*  
9 *blood quickly."*

10  
11  
12 Most women said pills were easy to use, some suggesting they were mild or weak because they were small  
13 and needed to be taken daily.

14 *Insiya: "These are so small. One doesn't even feel that one has taken something."*

15  
16  
17 One woman explicitly related size to potency:

18 *Ayesha: "Due to size they may have greater potency, the ones that are large-sized..."*

19 *Interviewer: "And this one that is small? (pointing to contraceptive pills)"*

20 *Ayesha: "It may be of lesser potency."*

21  
22  
23  
24  
25  
26  
27 Women expressed greatest fear of IUDs. Vaginal insertion already brings a sense of discomfort within the  
28 cultural milieu of Muslim women. Many who commented were less familiar with IUDs, and several  
29 expressed hesitation about inserting a foreign object into the body.

30 *Insiya: "When I went to get injected they showed me the IUD, that either I should use the injection or the*  
31 *IUD, but the mere sight of it appeared to be something dangerous"*

32  
33  
34  
35  
36 Several worried it would hurt their husbands:

37 *Shazia: "Yes, he experiences inconvenience. It is that wire-like thing, it sticks to him. He scolds me, 'Why did*  
38 *you get this done?' Later on he becomes normal. He says it is all right."*

39  
40  
41  
42 Several expressed concern about potential risks from IUD materials:

43 *Misbah: "Plastic and flesh are different, it will do some harm."*

44 *Interviewer: "This is plastic, that's why it will cause problems?"*

45 *Misbah: "Yes, it's plastic. That's why it causes some problem or another."*

46 *Interviewer: "What problem?"*

47 *Misbah: "I don't know, but I don't find it good."*

48  
49  
50  
51  
52 *Shaista: "Now copper is kept inside the wet body and something keeps on releasing from it. This is what*  
53 *people say. People used to tell me that it is rust and when it rusts from inside it will produce fungus inside*  
54 *the uterus and obviously fungus will be converted into cancer and many people complain of cancer."*

## 55 56 57 58 59 **Potency and side-effects**

60 Colour

1 Most stated that an object's colour did not affect its potency but helped with identification. A few noted that  
2 lighter colours meant the medicine was gentler.

3 *Shaista: "Obviously light colour medicines are more suitable and better, you might have seen that iron*  
4 *syrops are darker in colour and they have a different taste. When you drink it you will feel that you have*  
5 *eaten iron. It emits a smell like iron and does not suit us."*  
6  
7

#### 8 Heat

9  
10 Nearly all discussed medicinal potency and effect on their wellbeing in terms of heating (*garam taseer*) and  
11 cooling (*thandi taseer*) properties. Participants considered modern medicine heat generating and other  
12 therapies less so.

13 *Farida Bibi: "One hears that the medicines of the Hakeem are herbal and they are cooling. Even if these*  
14 *medicines do not bring relief, they do not cause harm."*  
15  
16

17  
18 All women identified contraceptives as 'heating,' with pills and injections particularly, considered more  
19 heating than other modern medicines:

20 *Aysha: "These things generate heat into one's body; one feels upset. If I take a tablet I feel uneasy and my*  
21 *heart pounds."*  
22  
23

24 *Interviewer: "What is its effect?"*  
25

26 *Qamar: "It is hot..."*  
27

28 *Interviewer: "Are all tablets hot?"*  
29

30 *Qamar: "Some are hotter than others."*  
31

32 *Interviewer: "Do you think these [contraceptives] are hotter or cooler?"*  
33

34 *Qamar: "Yes, these are hotter."*  
35  
36  
37

38 Women described the heating effect of contraceptives as resulting in, or further accentuating, irregular or  
39 excessive menstruation, weakness, and weight gain. Most said contraceptive heat resulted in excess bleeding:

40 *Shehnaz: "I got it [IUD] placed that's why I have more flow of menstruation; that happens with everyone."*  
41  
42  
43

44 Several equally interpreted missed menstruation as heat damage, discussing herbal remedies to encourage the  
45 onset of delayed menstruation:

46 *Nasreen: "Obviously, they [injections] are heat-generating. They may be burning the blood."*  
47

48 *Interviewer: "What do you mean by burning the blood as you cannot see the process?"*  
49

50 *Nasreen: "Just what elder women say; girls take injections; the blood gets burned; there is no*  
51 *menstruation."*  
52  
53  
54

55 Others focused on weakness and swelling.

56 *Pari: "If a woman is weak she shouldn't take it. I know how difficult it is for me. She won't tolerate it well.*  
57 *She will be so tired from taking pills. They are very hot and because they are hot they will rot your blood.*  
58 *You will feel unwell."*  
59  
60

1  
2 Nadira: "I was not like I am today. There is more swelling in my body. When one takes more medicines, I  
3 think it harms the body."  
4

5 Interviewer: "You are saying that it is due to hot medicines?"  
6

7 Nadira: "Yes it is due to heat."  
8  
9

## 10 Menstruation

11 A regular flow of menstruation was considered normal and healthy by all women. Women associated  
12 irregular bleeding with weakness, weight gain, and disease. Women associated menstrual irregularities with  
13 all three contraceptives, but those using injectables complained most:  
14

15 Nasreen: "I stopped taking injections; I say that the flow of menstruation is also essential."  
16  
17

18 Most reported menstruation as a form of cleansing. If it did not occur regularly then weight gain or serious  
19 disease could follow:  
20

21 Farida Bibi: "I too fear that my periods may stop and that my abdomen starts bulging."  
22  
23

24 Nasreen: "They say that if menstruation stops it causes internal diseases. Tumours are formed, obviously, if  
25 something dirty doesn't find its way out."  
26  
27

28 Women associated both excessive and insufficient menstruation with weakness. Perspectives varied as to  
29 whether weakness caused irregular bleeding or vice versa.  
30

31 Farida Bibi: "Some have excessive menses; they have it twice a month; as a result of which one gets weaker.  
32 For example, in our home there is my elder sister-in-law; it [IUD] did not suit her. She goes through  
33 excessive menstruation, even more than before. She is getting weaker day by day."  
34  
35  
36

37 Talat: "When it used to come every month it was ok. Now it is every 2-3 months. Then sometimes it is scanty  
38 and sometimes it is heavy."  
39

40 Interviewer: "How does that affect a woman?"  
41

42 Talat: "It causes weakness. When women menstruate, then weakness is relieved."  
43  
44  
45

## 46 Long-term effects

47 Women's perspectives were mixed whether long-term or repeated usage of contraception was harmful.  
48 Some, who felt comfortable with their method of contraception, said that extended usage of five to ten years  
49 was harmless:  
50

51 Ayesha: "What effect would it be? No, nothing..."  
52

53 Interviewer: "Nothing?"  
54

55 Ayesha: "It depends on you. You should take care of yourself."  
56  
57

58 Others were concerned about blood pressure, infertility, uterine damage, obesity, and 'problems with the  
59 blood'. The most common concern was temporary infertility:  
60

1 *Talat: "You won't get pregnant. When the effect of medicine finishes in the body, then pregnancy occurs. My*  
2 *niece had the injection. When she left the injection, a year or so after, when the effect of the medicine*  
3 *finished, she conceived."*  
4

5  
6  
7 *Nasreen: "If you use something in routine you should give a gap in between..."*

8 *Interviewer: "So if I desire child spacing of five years and if I use injections continuously?"*  
9

10 *Nasreen: "No, don't do that!"*

11 *Interviewer: "What is the risk involved in that?"*

12 *Nasreen: "The risk is that the menstruation will stop altogether."*

13 *Interviewer: "So is that risky?"*

14 *Nasreen: "Yes, that is dangerous!"*  
15  
16  
17

18  
19 One participant stated that prolonged usage of medicines reduces efficacy:

20 *Rashida: "Anything stops having an effect. If you continuously use a medicine its effect finishes."*  
21  
22

### 23 Suitability

24 While women said all medicines are heat generating, they clarified that the extent to which heating effects  
25 were felt depended on the person's blood. People have hot or cold blood, which reacts to hot or cold foods  
26 and medicines. Hot-blooded people were described as more sensitive to heat, getting rashes and being  
27 irritable by nature:  
28

29 *Aziza: "Yes. It [blood] is hot or cold, depending on the person's body makeup. We practice remedies by*  
30 *ourselves... for decreasing the heat of the body."*  
31  
32  
33

34  
35 Women discussed how contraceptives 'suit' or do not suit an individual. Many tried one method then  
36 switched to another because it did not suit them. Women understood each person to be different, and that  
37 each method had different effects on different people:  
38

39 *Pari: "Everyone says that the tube [IUD] suits some people and is better, but others whom it does not suit, it*  
40 *causes damage."*  
41  
42  
43

44  
45 *Qamar: "If it suits a woman, then they keep taking. And there are some women, like me, the injection*  
46 *harmed me, so I left it. Like these pills now suit me, in the same way there are some women whom the*  
47 *injection suits. Then they keep using the injection."*  
48  
49

50  
51 Women discussed how, after some time, negative effects of medicines could wear off and suit them better.  
52

### 53 DISCUSSION

54  
55  
56  
57 Participants were familiar with the strengths and weaknesses of multiple therapeutic approaches, and moved  
58 easily between them depending on the nature of the problem and whether the initial approach was considered  
59 effective. Women generally preferred modern approaches as providing more powerful and rapid results - and  
60

1 as the only choice for fertility control - but expressed concerns about long-term effects. Concepts of  
2 medicinal potency reflected those in other studies. For example, Nichter reports that Indian villagers  
3 perceived that modern medicine offered a quick cure but eventually harmed overall health.[18]  
4

5  
6 The contraceptive as object was meaningful for women. Particularly meaningful were fear of injection pain  
7 and discomfort about IUD insertion, both affecting contraceptive choices.[35 45] Despite preferring modern  
8 contraception, women used traditional medicine idioms to explain contraceptive objects and how these  
9 worked within their bodies. Women's perceptions of how contraceptives affected their health were grounded  
10 in the hot-cold explanatory idiom.[38] This idiom of the heating and cooling effects of food and medicine,  
11 combined with an individual's hot or cold blood, is found in many traditional health approaches including  
12 Chinese, North Indian, and South American.[39-44] The hot-cold concept is rooted in Hippocratic humoral  
13 medicine that spread via Arab influence.[41] Nichter describes Western medicines as heating and ayurvedic  
14 medicines as neutral, in reference to the speed and uncontrolled manner in which the former acts and  
15 perceived effect on the blood.[18]  
16  
17  
18  
19  
20  
21  
22

23 In Pakistan, the hot-cold idiom is an essential component of *hikmat*. Although *hikmat* was not a preferred  
24 therapeutic approach for participants, this idiom was essential to their understanding of how contraceptives  
25 worked and why individuals reacted differently. Women reported menstrual irregularities, weight gain and  
26 weakness as the main interconnected problems caused by the heating properties of contraceptives. While no  
27 other literature from Pakistan was found relating women's perceptions of contraception to this idiom, it was  
28 overwhelmingly part of participants' vocabulary. Weakness from already heated blood could be further  
29 aggravated by the heating effects of contraceptives. Women spoke of discontinuing or changing methods  
30 because of such side effects, supporting Casterline and others' conclusion that widespread concerns about  
31 adverse health consequences act as a barrier to adoption and continued usage of contraceptives.[10 24]  
32  
33  
34  
35  
36  
37  
38

39 Women worldwide have perceptions about menstrual bleeding and what is normal and natural. Participants  
40 perceived a regular menstrual flow as healthy. Similarly, women in Mali and South Africa equated  
41 menstruation with the womb being cleared of 'dirt,' thus allowing good health, so methods that interrupt the  
42 natural menstrual pattern were considered unacceptable.[24] Participants associated menstrual irregularities  
43 (e.g. reduced or increased flow) with dangerous outcomes from bloodlessness, weight gain and disease, and  
44 related them causally to the heating effects of contraceptives. Thus, injections were often perceived as the  
45 most heating since they most often led to menstrual irregularities. Several women used nutritional and herbal  
46 remedies to counteract the side-effects of modern medicines such as contraceptives, usually the perceived  
47 heating and weakening effects.[16 17]  
48  
49  
50  
51  
52

53 This exploratory study drew from the experiences of a small sample of twenty women, most of whom had  
54 experience of using some or all of the contraceptives discussed. Data saturation was not attempted due to  
55 time and security concerns. However, findings – particularly regarding the importance of the hot-cold idiom  
56 and menstrual regularity - suggest opportunities for further research.  
57  
58  
59  
60

## CONCLUSIONS

Study findings support existing research on contraceptive usage. Most women wanted family planning, but were not entirely comfortable with their experiences of contraceptive use. Findings provide explanatory models from women themselves that could, with further research, inform health messages and family planning counselling, strengthening programmes in Karachi and potentially elsewhere in Pakistan.

## ACKNOWLEDGMENTS

Authors thank the women from Shah Faisal Colony who shared their perspectives and experiences. Thanks to the RLCC health team for their facilitation and support.

## CONTRIBUTORS

Both authors contributed substantially to study design and data interpretation. KM conceived of the study, collected data, and drafted the article, with critical input and revision by NH. Both authors approved the final version before publication.

## FUNDING

Author salaries and costs were provided by their respective institutions. No additional funding was sought.

## ETHICAL APPROVAL

The study was approved by the ethics committee of the London School of Hygiene & Tropical Medicine (LSHTM) in the United Kingdom and the Institutional Review Board of Interactive Research and Development in Pakistan.

## COMPETING INTERESTS

None.

## REFERENCES

1. NIPS. Pakistan Demographic and Health Survey 2006-2007. Islamabad: National Institute of Population Studies, 2007.
2. PCO. Estimated population of Pakistan. Secondary Estimated population of Pakistan 2011.
3. World Bank. Data on annual population growth (%) <http://data.worldbank.org/indicator/SP.POP.GROW> (accessed Dec 2012), 2011.
4. Zafar MI. Husband-wife roles as a correlate of contraceptive and fertility behaviour. Pakistan development review 1996;**35**(2):145-70
5. Mahmood N, Ringheim K. Factors affecting contraceptive use in Pakistan. Pakistan development review 1996;**35**(1):1-22
6. Nasir JA, Hinde A. Factors associated with contraceptive approval among religious leaders in Pakistan. Journal of biosocial science 2011;**43**(5):587-96 doi: 10.1017/S0021932011000216[published Online First: Epub Date].
7. Saleem A, Pasha GR. Women's reproductive autonomy and barriers to contraceptive use in Pakistan. The European journal of contraception & reproductive health care : the official journal of the European Society of Contraception 2008;**13**(1):83-9 doi: 10.1080/01443610701577107[published Online First: Epub Date].
8. GoP. Development Amidst Crisis, Pakistan Millennium Development Goals Report Islamabad: Centre for Poverty Reduction and Social Policy Development, Planning Commission, 2010.

- 1 9. Fikree FF, Saleem S, Sami N. A quality of care issue: appropriate use and efficacy knowledge of five  
2 contraceptive methods: views of men and women living in low socioeconomic settlements of  
3 Karachi, Pakistan. JPMA. The Journal of the Pakistan Medical Association 2005;**55**(9):363-8
- 4 10. Casterline JB, Sathar ZA, ul Haque M. Obstacles to contraceptive use in Pakistan: a study in Punjab.  
5 Studies in family planning 2001;**32**(2):95-110
- 6 11. Zafar MI, Ford N, Ankomah A. Significance of beliefs and values in predicting fertility and  
7 contraceptive behaviour in Pakistan. Journal of biosocial science 1995;**27**(3):301-18
- 8 12. Jafarey SN. Maternal mortality in Pakistan--compilation of available data. JPMA. The Journal of the  
9 Pakistan Medical Association 2002;**52**(12):539-44
- 10 13. Hamid S, Stephenson R. Provider and health facility influences on contraceptive adoption in urban  
11 Pakistan. International family planning perspectives 2006;**32**(2):71-8 doi:  
12 10.1363/ifpp.32.071.06[published Online First: Epub Date].
- 13 14. Shaikh B. Unmet need for family planning in Pakistan – PDHS 2006–2007: it’s time to re-examine déjà  
14 vu. Open Access Journal of Contraception 2010;**1**:113-18
- 15 15. Carton TW, Agha S. Changes in contraceptive use and method mix in Pakistan: 1990-91 to 2006-07.  
16 Health policy and planning 2011 doi: 10.1093/heapol/czr022[published Online First: Epub Date].
- 17 16. Shaikh SH, Malik F, James H, Abdul H. Trends in the use of complementary and alternative medicine in  
18 Pakistan: a population-based survey. J Altern Complement Med 2009;**15**(5):545-50 doi:  
19 10.1089/acm.2008.0232[published Online First: Epub Date].
- 20 17. Shaikh BT, Hatcher J. Complementary and Alternative Medicine in Pakistan: Prospects and Limitations.  
21 Evidence-based complementary and alternative medicine : eCAM 2005;**2**(2):139-42 doi:  
22 10.1093/ecam/neh088[published Online First: Epub Date].
- 23 18. Nichter M. The layperson's perception of medicine as perspective into the utilization of multiple therapy  
24 systems in the Indian context. Social science & medicine. Medical anthropology 1980;**14B**(4):225-  
25 33
- 26 19. Kleinman A. *Patients and healers in the context of culture: An Exploration of the Borderland Between*  
27 *Anthropology, Medicine, and Psychiatry*: University of California Press, 1980.
- 28 20. Kleinman A. *The Illness Narratives: Suffering, Healing, & The Human Condition*: Basic Books, 1988.
- 29 21. Tolley E, Loza S, Kafafi L, Cummings S. The impact of menstrual side effects on contraceptive  
30 discontinuation: findings from a longitudinal study in Cairo, Egypt. International family planning  
31 perspectives 2005;**31**(1):15-23 doi: 10.1363/ifpp.31.15.05[published Online First: Epub Date].
- 32 22. Godfrey EM, Chin NP, Fielding SL, Fiscella K, Dozier A. Contraceptive methods and use by women  
33 aged 35 and over: A qualitative study of perspectives. BMC women's health 2011;**11**:5 doi:  
34 10.1186/1472-6874-11-5[published Online First: Epub Date].
- 35 23. Sultana A, Qazilbash A. Factors associated with failure of family planning methods in Pakistan: Burhan  
36 village case study. Working Paper Series #91. Islamabad: Sustainable Development Policy Institute,  
37 2004.
- 38 24. Williamson LM, Parkes A, Wight D, Petticrew M, Hart GJ. Limits to modern contraceptive use among  
39 young women in developing countries: a systematic review of qualitative research. Reproductive  
40 health 2009;**6**:3 doi: 10.1186/1742-4755-6-3[published Online First: Epub Date].
- 41 25. Zafar M, Habib-Ullah M, Rehman S, Abbasi S. Fertility regulating behaviour: a study of rural Punjab –  
42 Pakistan. Pakistan Journal of Applied Sciences 2003;**3**(6):376-84
- 43 26. Bhatti MH. Correlates of choice of contraceptive methods in Pakistan. Pakistan development review  
44 1995;**34**(4 Pt. III):889-98
- 45 27. Rajasekar D, Bigrigg A. Pill knowledge amongst oral contraceptive users in family planning clinics in  
46 Scotland: facts, myths and fantasies. The European journal of contraception & reproductive health  
47 care : the official journal of the European Society of Contraception 2000;**5**(1):85-90
- 48 28. Aleem N. Myths and misconceptions about contraceptive methods: An exploratory qualitative study  
49 amongst married youth of Karachi. Aga Khan University, 2010.
- 50 29. Ali S, Sophie R, Imam AM, et al. Knowledge, perceptions and myths regarding infertility among  
51 selected adult population in Pakistan: a cross-sectional study. BMC public health 2011;**11**:760 doi:  
52 10.1186/1471-2458-11-760[published Online First: Epub Date].
- 53 30. Harcourt W. Sex, lies and population: a view from the north? . Working Paper Series #3. Islamabad:  
54 Sustainable Development Policy Institute, 1992.
- 55 31. Spiers J. New perspectives on vulnerability using emic and etic approaches. Journal of advanced nursing  
56 2000;**31**(3):715-21
- 57 32. Scherer RF, Owen CL, Petrick JA, Brodzinski JD, Goyer KA. Initial development of an emic  
58 methodology for classification of stressful work situations. Perceptual and motor skills 1991;**73**(3 Pt  
59 1):1004-6

- 1 33. Tripp-Reimer T. Reconceptualizing the construct of health: integrating emic and etic perspectives.  
2 Research in nursing & health 1984;7(2):101-9
- 3 34. Karachi City Government. Shah Faisal Town (<http://www.karachicity.gov.pk/>). accessed September  
4 2012: City District Government Karachi, 2011.
- 5 35. Higgins JA, Hirsch JS. Pleasure, power, and inequality: incorporating sexuality into research on  
6 contraceptive use. American journal of public health 2008;98(10):1803-13 doi:  
7 10.2105/AJPH.2007.115790[published Online First: Epub Date].
- 8 36. Smith C. Content Analysis and Narrative Analysis. In: Reis H, Judd C, eds. Handbook of Research  
9 Methods in Social and Personality Psychology: Cambridge University Press, 2000.
- 10 37. Kamran I, Arif MS, Vassos K. Concordance and discordance of couples living in a rural Pakistani  
11 village: perspectives on contraception and abortion--a qualitative study. Global public health 2011;6  
12 **Suppl 1**:S38-51 doi: 10.1080/17441692.2011.590814[published Online First: Epub Date]].
- 13 38. Pool R. Hot and cold as an explanatory model: the example of Bharuch district in Gujarat, India. Social  
14 science & medicine 1987;25(4):389-99
- 15 39. Barrett RJ, Lucas RH. Hot and cold in transformation: is Iban medicine humoral? Social science &  
16 medicine 1994;38(2):383-93
- 17 40. Harwood A. The hot-cold theory of disease. Implications for treatment of Puerto Rican patients. JAMA :  
18 the journal of the American Medical Association 1971;216(7):1153-8
- 19 41. Hartog J, Hartog EA. Cultural aspects of health and illness behavior in hospitals. The Western journal of  
20 medicine 1983;139(6):910-6
- 21 42. Hilgert NI, Gil GE. Reproductive medicine in northwest Argentina: traditional and institutional systems.  
22 Journal of ethnobiology and ethnomedicine 2007;3:19 doi: 10.1186/1746-4269-3-19[published  
23 Online First: Epub Date]].
- 24 43. Singh A. Place of menstruation in the reproductive lives of women of rural North India. Indian Journal of  
25 Community Medicine 2006;31:10-14
- 26 44. Marcos S. Hot and cold classification in traditional Iguape medicine. Ethnology 1984;23(1):63-72
- 27 45. Kaneshiro B, Aeby T. Long-term safety, efficacy, and patient acceptability of the intrauterine Copper T-  
28 380A contraceptive device. International journal of women's health 2010;2:211-20
- 29  
30  
31  
32  
33  
34  
35  
36  
37  
38  
39  
40  
41  
42  
43  
44  
45  
46  
47  
48  
49  
50  
51  
52  
53  
54  
55  
56  
57  
58  
59  
60



## FIGURES

1  
2  
3  
4 **Figure 1** Map of Pakistan

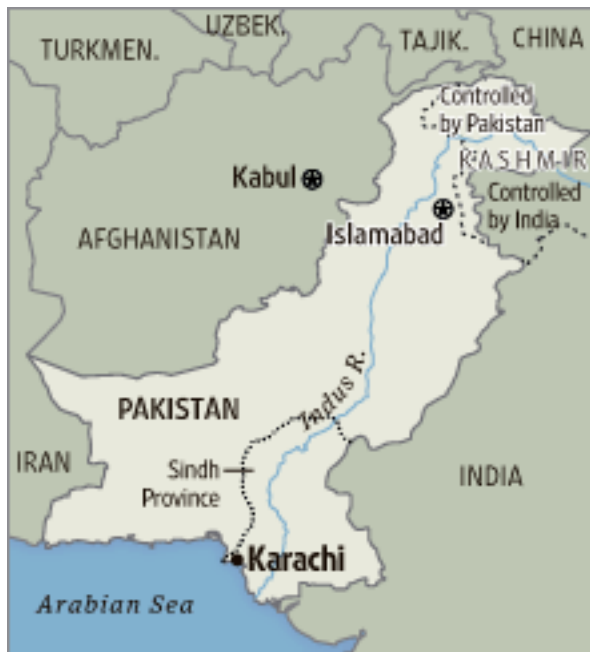

26  
27 Source: <http://jagonews.com/wp-content/uploads/2010/02/Karachi-map.gif> (accessed 20 April 2013)

28  
29  
30  
31 **Figure 2** Schematic map of Karachi showing the location of Shah Faisal Colony

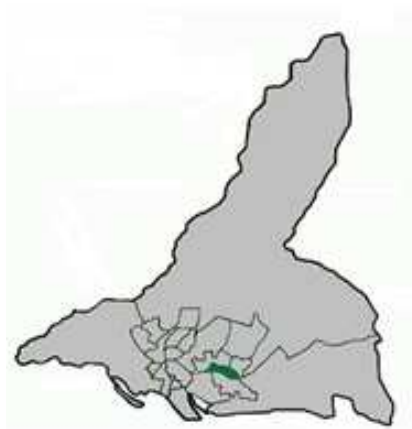

47 Source: Karachi City Government: [http://en.wikipedia.org/wiki/File:ShahFaisalTown\\_Karachi.PNG](http://en.wikipedia.org/wiki/File:ShahFaisalTown_Karachi.PNG) (accessed 20 April 2013)

## COREQ Checklist[1] for Marvi and Howard

| Nb.                                            | Item                                  | Responses                                                                                                                                                                                                                   |
|------------------------------------------------|---------------------------------------|-----------------------------------------------------------------------------------------------------------------------------------------------------------------------------------------------------------------------------|
| <b>Domain 1: Research team and reflexivity</b> |                                       |                                                                                                                                                                                                                             |
| <i>Personal characteristics</i>                |                                       |                                                                                                                                                                                                                             |
| 1                                              | Interviewer                           | The first author conducted all interviews.                                                                                                                                                                                  |
| 2                                              | Credentials                           | At the time of this study, the first author was an experienced NGO manager, completing an MSc in Public Health. The second author was an early-career academic, completing a doctorate in public health.                    |
| 3                                              | Occupation                            | The first author was country manager of a health leadership training NGO. The second author was a lecturer in global health policy.                                                                                         |
| 4                                              | Gender                                | Both authors were female.                                                                                                                                                                                                   |
| 5                                              | Experience/Training                   | Both authors had received masters-level training in qualitative study design, data collection, and analysis methods prior to the start of research. The second author had experience of conducting qualitative research.    |
| <i>Relationship with participants</i>          |                                       |                                                                                                                                                                                                                             |
| 6                                              | Relationship established              | The authors had no prior relationship with participants.                                                                                                                                                                    |
| 7                                              | Participant knowledge of interviewer  | Participants were informed about the interviewer's professional background, that she was conducting research as part of an MSc project and would seek to publish findings, and were given the opportunity to ask questions. |
| 8                                              | Interviewer characteristics           | The interviewer was an experienced health professional, particularly interested in the research topic to help improve understanding of women's perspectives among reproductive health leadership trainees.                  |
| <b>Domain 2: Study design</b>                  |                                       |                                                                                                                                                                                                                             |
| <i>Theoretical framework</i>                   |                                       |                                                                                                                                                                                                                             |
| 9                                              | Methodological orientation and theory | Content analysis                                                                                                                                                                                                            |
| <i>Participant selection</i>                   |                                       |                                                                                                                                                                                                                             |
| 10                                             | Sampling                              | Participants were selected purposively to provide a range of contraceptive users and non-users.                                                                                                                             |
| 11                                             | Method of approach                    | Participants were approached face-to-face.                                                                                                                                                                                  |
| 12                                             | Sample size                           | 20 participants.                                                                                                                                                                                                            |
| 13                                             | Non-participation                     | All women selected participated. Two pilot interviews were excluded. One interview was excluded and replaced, as it had not been recorded.                                                                                  |
| <i>Setting</i>                                 |                                       |                                                                                                                                                                                                                             |
| 14                                             | Data collection setting               | Data was collected in a private meeting room at a local clinic.                                                                                                                                                             |
| 15                                             | Presence of non-participants          | Non-participants were not present during interviews.                                                                                                                                                                        |
| 16                                             | Description of sample                 | Participants were women living in a low-income district of Karachi, within the RLCC catchment.                                                                                                                              |
| <i>Data collection</i>                         |                                       |                                                                                                                                                                                                                             |
| 17                                             | Interview guide                       | An interview guide was developed and piloted.                                                                                                                                                                               |
| 18                                             | Repeat interviews                     | Repeat interviews were not conducted.                                                                                                                                                                                       |
| 19                                             | Audio/Visual recording                | Digital audio recording used.                                                                                                                                                                                               |
| 20                                             | Field notes                           | Field notes were made during or immediately after each interview.                                                                                                                                                           |
| 21                                             | Duration                              | Interviews lasted an average of 60 minutes.                                                                                                                                                                                 |
| 22                                             | Data saturation                       | Data saturation was discussed.                                                                                                                                                                                              |
| 23                                             | Transcripts returned                  | Transcripts were returned where possible to confirm accuracy.                                                                                                                                                               |
| <b>Domain 3: Data analysis and findings</b>    |                                       |                                                                                                                                                                                                                             |
| <i>Data analysis</i>                           |                                       |                                                                                                                                                                                                                             |
| 24                                             | Number of data coders                 | Both authors were involved in coding.                                                                                                                                                                                       |
| 25                                             | Description of coding tree            | Coding was non-hierarchical.                                                                                                                                                                                                |
| 26                                             | Derivation of themes                  | Themes were derived from the data.                                                                                                                                                                                          |
| 27                                             | Software                              | Software was not used.                                                                                                                                                                                                      |
| 28                                             | Participant checking                  | It was not possible to contact participants for their feedback on analysis.                                                                                                                                                 |
| <i>Reporting</i>                               |                                       |                                                                                                                                                                                                                             |

|    |                              |                                                     |
|----|------------------------------|-----------------------------------------------------|
| 29 | Quotations presented         | Quotations were presented, identified by pseudonym. |
| 30 | Data and findings consistent | Data and findings presented were consistent.        |
| 31 | Clarity of major themes      | Major themes were presented in findings.            |
| 32 | Clarity of minor themes      | Diverse cases and minor themes were discussed.      |

1. Tong A, Sainsbury P, Craig J. Consolidated criteria for reporting qualitative research (COREQ): a 32-item checklist for interviews and focus groups. *International journal for quality in health care : journal of the International Society for Quality in Health Care / ISQua* 2007;**19**(6):349-57 doi: 10.1093/intqhc/mzm042[published Online First: Epub Date]].

For peer review only



**Objects of temporary contraception: an exploratory study of women's perspectives in Karachi, Pakistan**

|                                 |                                                                                                                                                                                                                      |
|---------------------------------|----------------------------------------------------------------------------------------------------------------------------------------------------------------------------------------------------------------------|
| Journal:                        | <i>BMJ Open</i>                                                                                                                                                                                                      |
| Manuscript ID:                  | bmjopen-2013-003279.R1                                                                                                                                                                                               |
| Article Type:                   | Research                                                                                                                                                                                                             |
| Date Submitted by the Author:   | 04-Jul-2013                                                                                                                                                                                                          |
| Complete List of Authors:       | Marvi, Kamyla; Institute of International Education, Karachi, Leadership Development for Mobilising Reproductive Health (LDM)<br>Howard, Natasha; London School of Hygiene & Trop Med, Global Health and Development |
| <b>Primary Subject Heading</b>: | Qualitative research                                                                                                                                                                                                 |
| Secondary Subject Heading:      | Sexual health, Reproductive medicine                                                                                                                                                                                 |
| Keywords:                       | QUALITATIVE RESEARCH, PUBLIC HEALTH, REPRODUCTIVE MEDICINE                                                                                                                                                           |
|                                 |                                                                                                                                                                                                                      |

SCHOLARONE™  
Manuscripts

1 **OBJECTS OF TEMPORARY CONTRACEPTION: AN EXPLORATORY STUDY OF WOMEN'S**  
2 **PERSPECTIVES IN KARACHI, PAKISTAN**  
3  
4

5 Kamyla Marvi<sup>1</sup> and Natasha Howard<sup>2</sup>  
6  
7

8 <sup>1</sup> Leadership Development for Mobilising Reproductive Health (LDM), Institute of International  
9 Education, Karachi, Pakistan; [kamyla.marvi@gmail.com](mailto:kamyla.marvi@gmail.com)  
10

11 <sup>2</sup> Department of Global Health and Development, London School of Hygiene and Tropical Medicine  
12 (LSHTM), London, UK  
13  
14

15 **Correspondence to**

16 Natasha Howard, Department of Global Health and Development, Faculty of Public Health and Policy,  
17 LSHTM, 15-17 Tavistock Place, London, WC1H 9SH; T: +44 (0)2079272144; F: +44 (0)207436 5389; E:  
18 [natasha.howard@lshtm.ac.uk](mailto:natasha.howard@lshtm.ac.uk)  
19  
20  
21  
22

23 **Key words**

24 Family planning, qualitative research, traditional medicine, Pakistan  
25  
26  
27

28 **Word count:** 3,824  
29  
30  
31  
32  
33  
34  
35  
36  
37  
38  
39  
40  
41  
42  
43  
44  
45  
46  
47  
48  
49  
50  
51  
52  
53  
54  
55  
56  
57  
58  
59  
60

## ABSTRACT

### Objective

To explore perspectives of three modern contraceptive objects, using an *emic* approach, among women in Shah Faisal Colony, a low-income community in Karachi, Pakistan.

### Methods

In-depth face-to-face interviews of non-users (n=5), injection users (n=7), pill users (n=4), and IUD users (n=4) were conducted in 2011. Qualitative content analysis with an inductive approach and manual thematic coding was used to analyse data.

### Results

Awareness of family planning was high. Women described different therapeutic approaches, stating they generally preferred modern medicine for contraception as it was fastest and most powerful. They reported that fear of some contraceptive objects, particularly injections and IUDs, influenced their choices. Women explained their perceptions of how the heating effects of contraceptives could cause unwanted side-effects including menstrual irregularities, weight gain, and weakness, leading to disease.

### Conclusions

Most women wanted family planning, but remained dissatisfied with available contraceptives and their effects. While women reported that they relied on modern medicine for contraception, their descriptions of how contraceptives affected their health relied on the hot-cold explanatory idiom of traditional medicine.

#### Article focus

- To explore women's understanding and interpretations of three modern contraceptives.

#### Key messages

- Women were knowledgeable about family planning and relied on modern contraceptives.
- Contraceptive potency and effects were interpreted using the hot-cold idiom of traditional medicine.
- Consideration of women's interpretive idioms could help providers improve health messages and family planning counselling.

#### Study strengths and limitations

- Use of qualitative methods provided rich insight into women's interpretations and decision-making regarding contraceptives.
- Available time and funding constrained the sample size, limiting inclusion of a potentially broader range of perspectives.

## INTRODUCTION

Pakistan, the world's sixth most populous country, has an estimated population of 176 million.[1 2] Annual population growth of 2.1% resulted in the population quadrupling in the past fifty years with 41% below age fifteen.[1 3] Potential reasons are both demand-side (e.g. female autonomy, religious beliefs, son preference [4-7]) and supply-side (e.g. cost, poor distribution, and limited coverage of contraceptives [8-10]). A rise in political and religious extremism since the dictatorship of Zia ul Haq (1977-88), Pakistan's subsequent involvement in the international 'war on terror,' poor governance, and corruption have weakened the economy, worsening social indicators.[11] High population growth strains Pakistan's limited resources, affecting health indicators. For example, with reproductive-age women constituting almost one-quarter of Pakistan's total population, a low contraceptive prevalence rate (CPR) of 29.6%, with much lower rates among poor and rural populations, contributes to a high maternal mortality ratio of 260/100,000 - mostly preventable haemorrhage, eclampsia, and sepsis.[1 5 12 13]

Pakistan has had a population programme since the 1960s and family planning awareness is nearly universal, with 96% of women surveyed identifying at least one modern contraceptive method.[1 14] While modern contraceptives comprise 73% of Pakistan's CPR, temporary methods allowing birth spacing (e.g. pills, IUDs, injectables, implants, condoms) comprise 13.6% of current usage, of which half (6.8%) are condoms.[1] Thus, only a small proportion of Pakistani couples use temporary methods with evidence suggesting a significant unmet need for contraception (Table 1).[1 15 16]

**Table 1 Percentage method usage among married women aged 15-49 in Pakistan**

| Method                                   | Current usage | Ever used | Residence |       | Education  |                     |        | Wealth Quintile |     |     |     |     |
|------------------------------------------|---------------|-----------|-----------|-------|------------|---------------------|--------|-----------------|-----|-----|-----|-----|
|                                          |               |           | Urban     | Rural | Illiterate | Primary / Secondary | Higher | 1               | 2   | 3   | 4   | 5   |
| Hormonal pill                            | 2.1           | 12.2      | 2.6       | 1.8   | 2.0        | 2.0                 | 2.9    | 1.5             | 1.8 | 1.9 | 2.6 | 2.4 |
| Injectable contraceptive                 | 2.3           | 11.1      | 2.3       | 2.3   | 2.1        | 2.9                 | 1.1    | 1.6             | 2.5 | 3.2 | 2.7 | 1.6 |
| Intra-uterine contraceptive device (IUD) | 2.3           | 8         | 2.6       | 2.1   | 1.9        | 2.6                 | 4.5    | 1.0             | 1.5 | 2.8 | 1.7 | 4.8 |

Source: [1]

Pakistan is a predominantly Muslim society with formal, informal, and popular healthcare approaches coexisting. Pakistan's formal medical system includes modern (i.e. Western) medicine, westernised homeopathy, and traditional *hikmat*. *Hikmat* or *unani tibb* is traditional Greco-Arab medicine, widely practiced in Pakistan, with similarities to Indian *Ayurvedic* medicine. Modern medicine is the most common approach in urban settings and government facilities, but overlaps with traditional and folk approaches.[17 18] Shaikh and colleagues found health providers often presented false qualifications or interpreted modern medicine to suit patient beliefs.[17] While contraceptives are modern medicine, popular perceptions and practices are influenced by religion and other therapeutic approaches.[12 18] Nichter noted that multiple therapy systems coexist in most countries, despite the regulatory efforts of government or vested interests of

1 dominant therapy systems.[19] Kleinman classified the professional, traditional, and popular as three  
2 overlapping systems, while Nichter found providers underappreciated the ways popular ideas about medicine  
3 influenced healthcare seeking and compliance.[19-21]  
4

5  
6 Women's perceptions of contraceptives significantly influence their decisions to start or continue family  
7 planning in Pakistan, supporting recent global discourse on influences of side-effects on usage.[22-26] Bhatti  
8 and colleagues found 12.1% of non-users cited method-related reasons, including fear of side-effects and  
9 interference with normal bodily processes.[1 27] Sultana and colleagues found a 29% discontinuation rate for  
10 female methods in Punjab was primarily due to side-effects, as contraceptive users associated all subsequent  
11 health problems (e.g. obesity, body aches, high blood pressure, nausea, irregular bleeding, infertility) with  
12 contraceptive usage.[24]  
13  
14  
15  
16  
17

18  
19 Most studies approach contraceptive behaviour from medical or behavioural perspectives, with minimal  
20 consideration of the contraceptive objects used.[28] Such approaches can result in women's perspectives  
21 being minimised as misconceptions.[29 30] Little research has explored the explanatory models Pakistani  
22 women apply to their contraceptive beliefs.[29] The term 'misconception' already implies these beliefs are  
23 flawed, and that the alternative medical model provides the correct explanation. However, these beliefs are  
24 entrenched in age-old belief systems and experiences that are real and personal to women and those around  
25 them. Nishtar found these beliefs to be based on societal perceptions, which women considered must have  
26 some basis in truth to be so widespread.[29] Multiple sources of perception create the basis on which each  
27 woman makes decisions.[31] The objects used for temporary contraception have their own potency to affect  
28 the body's functioning, perceptions of which influence usage decisions (e.g. whether, which, how long?).  
29 Little *emic* data, showing behaviour or beliefs in culturally meaningful terms, connects popular perceptions  
30 of contraception to usage.[32 33]  
31  
32  
33  
34  
35  
36  
37

38  
39 This study examined perceptions of modern contraceptive objects, using an *emic* perspective, among women  
40 in a low-income community of Karachi, Pakistan.[34] The research question was 'What are these women's  
41 beliefs about contraceptive objects and do those beliefs affect usage decisions?' It contributes to the literature  
42 on unmet need by describing how popular perceptions affect usage. Study objectives were to:  
43  
44

- 45 • describe women's perceptions of three temporary contraceptives as objects (i.e. injections, pills, IUDs);
- 46 • consider how women's perceptions of contraceptive usage and potency within their own therapeutic  
47 paradigms affected usage decisions.  
48  
49

## 50 51 **METHODS**

52  
53  
54 Ethics approval was granted by the LSHTM research ethics committee in the United Kingdom and the  
55 Institutional Review Board of Interactive Research and Development in Pakistan.  
56  
57  
58  
59  
60



1 With approximately 18 million inhabitants, Karachi is the commercial, industrial and financial hub of  
2 Pakistan (Figure 1).[35] Shah Faisal Colony (Figure 2), with a population of over 335,000, has experienced  
3 violent civil clashes. It was chosen for its ethnic diversity and low socioeconomic level. A local non-  
4 governmental organisation, Rana Liaquat Craftsman Colony (RLCC), provided a community entry point,  
5 facilitating access with women. RLCC has provided basic clinic services in Shah Faisal Colony since 1954,  
6 providing services to approximately 5,400 families. Women living in the study site have access to  
7 contraceptives through door-to-door distribution of condoms and pills, and clinical access to IUDs and  
8 injectables through NGO workers. Contraceptives were sold for Pakistani Rupees 1 (US\$0.01) per condom,  
9 Pakistani Rupees 10 (US\$0.10) for oral pills, Pakistani Rupees 100 (US\$1.0) for 3-month injectables, and  
10 Pakistani Rupees 300 (US\$3.0) for IUD insertion.

11  
12  
13  
14  
15  
16  
17  
18 In-depth face-to-face interviews were chosen to explore women's experiences and perceptions. Twenty  
19 participants were purposively sampled, for diversity of opinion, from the population of non-menopausal  
20 married women over age 20, living in Shah Faisal Colony, Karachi. No other inclusion and exclusion criteria  
21 were used. Researchers aimed for:

- 22 • 5 non-users of contraception;
- 23 • 5 injectable contraceptive users (1, 2 or 3-month dosage);
- 24 • 5 oral pill users;
- 25 • 5 IUD users.

26  
27  
28  
29  
30  
31 Participants were recruited by RLCC outreach workers, trained for one day in qualitative recruitment  
32 methods, who distributed study information sheets and obtained written informed consent from all literate  
33 potential participants. Verbal consent was taken from illiterate participants after reading out and discussing  
34 information sheet and consent form with them. The lead author was responsible for final participant  
35 selection, reconfirmation of consent and conducting interviews in a private room at the RLCC health centre.  
36 Two pilot interviews were conducted to finalise the interview guide. The guide ensured themes of interest  
37 were covered, though interviews were conducted as loosely guided conversations to allow women control in  
38 defining topics. Interviews were digitally recorded with participant permission and took approximately one  
39 hour. Recordings were given a pseudonym to ensure confidentiality, which was also recorded on the consent  
40 form and kept in a locked file. Observations were recorded for each interview.

41  
42  
43  
44  
45  
46  
47  
48 Interviews were transcribed in Urdu, translated into English, and typed into Microsoft Word by a  
49 professional transcriptionist and translator familiar with reproductive health terminology. Translations were  
50 checked by the interviewer, and participants where possible, to ensure accuracy. Transcripts were labelled by  
51 pseudonym and numbered by page and line.

52  
53  
54  
55  
56 Following principles of interpretive social research, the interviewer conducted initial analysis to increase  
57 interpretability and deepen understanding of social and emotional context.[36] Qualitative content analysis  
58 with manual thematic coding was used, with an inductive approach to building non-hierarchical themes and  
59

identifying meaning.[37] Consensus was reached between authors on differences found. Data was triangulated by comparing responses to similar questions in different transcript sections.

## FINDINGS

Twenty-one interviews were conducted. One, unrecorded, was excluded. Of 20 participants (Table 2), six were illiterate and others educated to secondary level, with two completing matriculation after grade 10 and five completing intermediate certification after grade 12. Most (i.e. 13 women) were housewives, three did piecework embroidery at home, and a few had outside jobs (e.g. domestic work, teaching, one actress). Half of husbands (i.e. 11) worked in low-income jobs (e.g. street merchants), six were semi-skilled or skilled labourers (e.g. electrician, driver, barber), while two husbands were unemployed. Women were of various ethnicities, including three Pathans, five Muhajir, and seven Punjabis. All were Muslim and most had resided in the area since childhood (7) or marriage (11). Participants averaged 31 years old (25-45 years), were married and still menstruating. Non-users were on average 10 years older than contraceptive users (38 versus 28). All had children, ranging from seven months to 25 years old. Participants had an average of three children each (range 1-10). Non-users had fewer male children on average, at 0.80 male and 2.6 female versus 1.5 male and 1.6 female for contraceptive users. Of the fifteen contraceptive users, seven used injectable contraceptives, four used contraceptive pills, and four used an IUD. Thirteen contraceptive users cited the expense of raising children as their primary reason for birth spacing, while two cited previous pregnancy complications.

**Table 2** Participant demographics, ordered by contraceptive usage and age

| Pseudonym   | Usage               | Age   | Education     | Origin  | Living children |   |
|-------------|---------------------|-------|---------------|---------|-----------------|---|
|             |                     |       |               |         | M               | F |
| Ayesha      | Non User            |       | Grade 9       | Haripur | 2               | 1 |
| Nadira      | Non User            | 31    | Intermediate  | Pindi   | 0               | 2 |
| Kaukab      | Non User (pregnant) | 37    | Grade 5       | Abbasi  | 0               | 4 |
| Rashida     | Non User            | 40    | Grade 9       | -       | 0               | 5 |
| Aziza       | Non User            | 45    | Matriculation | Muhajir | 2               | 1 |
| Karima      | Injection           | 25    | Grade 8       | Punjabi | 1               | 0 |
| Sofia       | Injection           | 25-26 | Grade 8       | -       | 1               | 2 |
| Farida Bibi | Injection           | 28    | Intermediate  | -       | 1               | 0 |
| Rehmat      | Injection           | 28    | Intermediate  | Muhajir | 2               | 0 |
| Talat       | Injection           | 28    | Illiterate    | Punjabi | 0               | 4 |
| Gul Zehra   | Injection           | 33    | Illiterate    | Pathan  | 2               | 8 |
| Nasreen     | Injection           | 35    | Matriculation | Punjabi | 2               | 1 |
| Misbah      | Pills               |       | Illiterate    | Pathan  | 1               | 1 |
| Qamar       | Pills               | 23    | Grade 8       | Punjabi | 1               | 1 |
| Pari        | Pills               | 28    | Illiterate    | Punjabi | 2               | 2 |

|         |       |     |              |         |   |   |
|---------|-------|-----|--------------|---------|---|---|
| Insiya  | Pills | 28  | Intermediate | -       | 2 | 1 |
| Shazia  | IUD   |     | Illiterate   | Punjabi | 1 | 1 |
| Mariam  | IUD   | <30 | Illiterate   | Pathan  | 1 | 2 |
| Shaista | IUD   | 30  | Intermediate | Muhajir | 2 | 1 |
| Shehnaz | IUD   | 31  | Grade 8      | Muhajir | 3 | 1 |

NB: Education in Pakistan is organised into primary (grades 1-5); middle (grades 6-8); high (grades 9-10, culminating in matriculation); intermediate (grades 11-12, culminating in intermediate diploma).

Emergent themes are organised under therapeutic systems, contraceptives as objects, and potency and side-effects.

### Therapeutic systems

All women discussed multiple therapeutic systems, including doctors practicing through private and government services, lady health workers, traditional birth attendants, homeopaths, *hakeems*, and practitioners offering healing prayers.[17] Most women used home remedies and explored different systems with varying success:

*Talat: "Yes we have tried all. We have had prayers done; we have taken medicines from doctors, and hakeems too. Some are good and effective."*

*Nadira: "For example, a complete treatment for jaundice does not exist in modern medicine, which simply advises to take more water and juices; but homeopathy has the treatment for this."*

Women preferred the speed and power of modern treatments:

*Talat: "Most of the time we take medicines from doctors [because] we get relief more quickly. Children get better. Rather than taking remedies we more often take medicine from outside so that the children can be comfortable more quickly. They shouldn't suffer."*

*Rehmat: "The difference is that the homeopathic impact is very late, and modern medicine, such as injections etc., has an immediate effect... A person recovers immediately."*

*Farida Bibi: "Very few people go to a Hakeem; and those that do are elderly. I mean to say, those who, because of their age are unable to use the medicines of a doctor as they are of greater power, they go to a Hakeem."*

Women used home remedies or modern services for reproductive issues. Most chose delivery in hospitals or maternity clinics, with only four reporting giving birth with the help of a *dai* or traditional birth attendant. Nineteen of twenty participants expressed eagerness to space their children. Non-users spoke of birth spacing through breast-feeding or other natural methods, with one woman using withdrawal. Participants were not asked about birth limiting versus birth spacing. All women preferred modern contraceptives, and knew of no methods emerging from alternative therapy systems.

## Contraceptives as objects

Women were shown injectable contraceptives, pills, and IUDs during interviews to elicit their perceptions.

All were familiar with injections as objects, as Pakistani practitioners commonly overprescribe them.[38]

Women expressed different levels of fear, from mild to much stronger discomfort:

*Rehmat: "The [contraceptive] injection hurts so much that I get shaken up, although I try to control myself. She says to leave the body loose, but when an injection is going inside, how I can leave it loose? My leg becomes numb. She says 'I don't know - this doesn't happen with anyone else, just you...'"*

Some women said injections generally were a more powerful and faster way of delivering medicine to the body.

*Rehmat: "When we eat medicine, it affects after a while. Injections effect immediately, they mix with the blood quickly."*

Most women said contraceptive pills were easy to use, some suggesting they were mild or weak because they were small and needed to be taken daily.

*Insiya: "These are so small. One doesn't even feel that one has taken something."*

One woman explicitly related size to potency:

*Ayesha: "Due to size they may have greater potency, the ones that are large-sized..."*

*Interviewer: "And this one that is small? (pointing to contraceptive pills)"*

*Ayesha: "It may be of lesser potency."*

Women expressed greatest fear of IUDs. Vaginal insertion already brings a sense of discomfort within the cultural milieu of Muslim women. Many who commented were less familiar with IUDs, and several expressed hesitation about inserting a foreign object into the body.

*Insiya: "When I went to get injected they showed me the IUD, that either I should use the injection or the IUD, but the mere sight of it appeared to be something dangerous"*

Several worried it would hurt their husbands:

*Shazia: "Yes, he experiences inconvenience. It is that wire-like thing, it sticks to him. He scolds me, 'Why did you get this done?' Later on he becomes normal. He says it is all right."*

Several expressed concern about potential risks from IUD materials:

*Misbah: "Plastic and flesh are different, it will do some harm."*

*Interviewer: "This is plastic, that's why it will cause problems?"*

*Misbah: "Yes, it's plastic. That's why it causes some problem or another."*

*Interviewer: "What problem?"*

*Misbah: "I don't know, but I don't find it good."*

1  
2  
3  
4  
5  
6  
7  
8  
9  
10  
11  
12  
13  
14  
15  
16  
17  
18  
19  
20  
21  
22  
23  
24  
25  
26  
27  
28  
29  
30  
31  
32  
33  
34  
35  
36  
37  
38  
39  
40  
41  
42  
43  
44  
45  
46  
47  
48  
49  
50  
51  
52  
53  
54  
55  
56  
57  
58  
59  
60

*Shaista: "Now copper is kept inside the wet body and something keeps on releasing from it. This is what people say. People used to tell me that it is rust and when it rusts from inside it will produce fungus inside the uterus and obviously fungus will be converted into cancer and many people complain of cancer."*

### **Potency and side-effects**

#### **Colour**

Most stated that an object's colour did not affect its potency but helped with identification. A few noted that lighter colours meant the medicine was gentler.

*Shaista: "Obviously light colour medicines are more suitable and better, you might have seen that iron syrups are darker in colour and they have a different taste. When you drink it you will feel that you have eaten iron. It emits a smell like iron and does not suit us."*

#### **Heat**

Nearly all discussed medicinal potency and effect on their wellbeing in terms of heating (*garam taseer*) and cooling (*thandi taseer*) properties. Participants considered modern medicine heat generating and other therapies less so.

*Farida Bibi: "One hears that the medicines of the Hakeem are herbal and they are cooling. Even if these medicines do not bring relief, they do not cause harm."*

All women identified contraceptives as 'heating,' with pills and injections particularly, considered more heating than other modern medicines:

*Aysha: "These things generate heat into one's body; one feels upset. If I take a tablet I feel uneasy and my heart pounds."*

*Interviewer: "What is its effect?"*

*Qamar: "It is hot..."*

*Interviewer: "Are all tablets hot?"*

*Qamar: "Some are hotter than others."*

*Interviewer: "Do you think these [contraceptives] are hotter or cooler?"*

*Qamar: "Yes, these are hotter."*

Women described the heating effect of contraceptives as resulting in, or further accentuating, irregular or excessive menstruation, weakness, and weight gain. Most said contraceptive heat resulted in excess bleeding.

*Shehnaz: "I got it [IUD] placed that's why I have more flow of menstruation; that happens with everyone."*

Several equally interpreted missed menstruation as heat damage, discussing herbal remedies to encourage the onset of delayed menstruation:

*Nasreen: "Obviously, they [contraceptive injections] are heat-generating. They may be burning the blood."*

*Interviewer: "What do you mean by burning the blood as you cannot see the process?"*

1 *Nasreen: "Just what elder women say; girls take injections; the blood gets burned; there is no*  
2 *menstruation."*

3  
4  
5 Others focused on weakness and swelling.

6 *Pari: "If a woman is weak she shouldn't take it. I know how difficult it is for me. She won't tolerate it well.*  
7 *She will be so tired from taking pills. They are very hot and because they are hot they will rot your blood.*  
8 *You will feel unwell."*

9  
10  
11  
12 *Nadira: "I was not like I am today. There is more swelling in my body. When one takes more medicines, I*  
13 *think it harms the body."*

14 *Interviewer: "You are saying that it is due to hot medicines?"*

15 *Nadira: "Yes it is due to heat."*

## 16 17 18 19 20 Menstruation

21 A regular flow of menstruation was considered normal and healthy by all women. Women associated  
22 irregular bleeding with weakness, weight gain, and disease. Women associated menstrual irregularities with  
23 all three contraceptives, but those using injectables complained most:

24 *Nasreen: "I stopped taking [contraceptive] injections; I say that the flow of menstruation is also essential."*

25  
26  
27  
28  
29 Most reported menstruation as a form of cleansing. If it did not occur regularly then weight gain or serious  
30 disease could follow:

31 *Farida Bibi: "I too fear that my periods may stop and that my abdomen starts bulging."*

32  
33  
34  
35  
36 *Nasreen: "They say that if menstruation stops it causes internal diseases. Tumours are formed, obviously, if*  
37 *something dirty doesn't find its way out."*

38  
39  
40 Women associated both excessive and insufficient menstruation with weakness. Perspectives varied as to  
41 whether weakness caused irregular bleeding or vice versa.

42 *Farida Bibi: "Some have excessive menses; they have it twice a month; as a result of which one gets weaker.*  
43 *For example, in our home there is my elder sister-in-law; it [IUD] did not suit her. She goes through*  
44 *excessive menstruation, even more than before. She is getting weaker day by day."*

45  
46  
47  
48  
49 *Talat: "When it used to come every month it was ok. Now it is every 2-3 months. Then sometimes it is scanty*  
50 *and sometimes it is heavy."*

51 *Interviewer: "How does that affect a woman?"*

52 *Talat: "It causes weakness. When women menstruate, then weakness is relieved."*

53  
54  
55  
56  
57 Long-term effects

1 Women's perspectives were mixed whether long-term or repeated usage of contraception was harmful.  
2 Some, who felt comfortable with their method of contraception, said that extended usage of five to ten years  
3 was harmless:  
4

5 *Ayesha: "What effect would it be? No, nothing..."*

6 *Interviewer: "Nothing?"*

7 *Ayesha: "It depends on you. You should take care of yourself."*  
8  
9

10  
11 Others were concerned about blood pressure, infertility, uterine damage, obesity, and 'problems with the  
12 blood'. The most common concern was temporary infertility:  
13

14 *Talat: "You won't get pregnant. When the effect of medicine finishes in the body, then pregnancy occurs. My  
15 niece had the injection. When she left the injection, a year or so after, when the effect of the medicine  
16 finished, she conceived."*  
17  
18

19  
20 *Nasreen: "If you use something in routine you should give a gap in between..."*

21 *Interviewer: "So if I desire child spacing of five years and if I use injections continuously?"*

22 *Nasreen: "No, don't do that!"*

23 *Interviewer: "What is the risk involved in that?"*

24 *Nasreen: "The risk is that the menstruation will stop altogether."*

25 *Interviewer: "So is that risky?"*

26 *Nasreen: "Yes, that is dangerous!"*  
27  
28  
29  
30  
31

32  
33 One participant stated that prolonged usage of medicines reduces efficacy:

34 *Rashida: "Anything stops having an effect. If you continuously use a medicine its effect finishes."*  
35  
36

### 37 Suitability

38 While women said all medicines are heat generating, they clarified that the extent to which heating effects  
39 were felt depended on the person's blood. People have hot or cold blood, which reacts to hot or cold foods  
40 and medicines. Hot-blooded people were described as more sensitive to heat, getting rashes and being  
41 irritable by nature:  
42  
43

44 *Aziza: "Yes. It [blood] is hot or cold, depending on the person's body makeup. We practice remedies by  
45 ourselves... for decreasing the heat of the body."*  
46  
47  
48

49 Women discussed how contraceptives 'suit' or do not suit an individual. Many tried one method then  
50 switched to another because it did not suit them. Women understood each person to be different, and that  
51 each method had different effects on different people:  
52  
53

54 *Pari: "Everyone says that the tube [IUD] suits some people and is better, but others whom it does not suit, it  
55 causes damage."*  
56  
57  
58  
59  
60

1 *Qamar: "If it suits a woman, then they keep taking. And there are some women, like me, the [contraceptive]*  
2 *injection harmed me, so I left it. Like these pills now suit me, in the same way there are some women whom*  
3 *the injection suits. Then they keep using the injection."*  
4

5  
6  
7 Women discussed how, after some time, negative effects of medicines could wear off and suit them better.  
8

## 9 10 **DISCUSSION**

11  
12  
13 Participants were familiar with the strengths and weaknesses of multiple therapeutic approaches, and moved  
14 easily between them depending on the nature of the problem and whether the initial approach was considered  
15 effective. Women generally preferred modern approaches as providing more powerful and rapid results - and  
16 as the only choice for fertility control - but expressed concerns about long-term effects. Concepts of  
17 medicinal potency reflected those in other studies. For example, Nichter reports that Indian villagers  
18 perceived that modern medicine offered a quick cure but eventually harmed overall health.[19]  
19  
20  
21

22  
23  
24 The contraceptive as object was meaningful for women. Particularly meaningful were fear of injection pain  
25 and discomfort about IUD usage, both affecting contraceptive choices.[36 39] Despite preferring modern  
26 contraception, women used traditional medicine idioms to explain contraceptive objects and how these  
27 worked within their bodies. Women's perceptions of how contraceptives affected their health were grounded  
28 in the hot-cold explanatory idiom.[40] This idiom of the heating and cooling effects of food and medicine,  
29 combined with an individual's hot or cold blood, is found in many traditional health approaches including  
30 Chinese, North Indian, and South American.[41-46] The hot-cold concept is rooted in Hippocratic humoral  
31 medicine that spread via Arab influence.[43] Nichter describes Western medicines as heating and ayurvedic  
32 medicines as neutral, in reference to the speed and uncontrolled manner in which the former acts and  
33 perceived effect on the blood.[19]  
34  
35  
36  
37  
38  
39

40  
41 In Pakistan, the hot-cold idiom is an essential component of *hikmat*. Although *hikmat* was not a preferred  
42 therapeutic approach for participants, this idiom was essential to their understanding of the effects of  
43 contraceptives on their bodies and why individuals reacted differently. Women reported menstrual  
44 irregularities, weight gain and weakness as the main interconnected problems caused by the heating  
45 properties of contraceptives. While no other literature from Pakistan was found relating women's perceptions  
46 of contraception to this idiom, it was overwhelmingly part of participants' vocabulary. Weakness from  
47 already heated blood could be further aggravated by the heating effects of contraceptives. Women spoke of  
48 discontinuing or changing methods because of such side effects, supporting Casterline and others'  
49 conclusion that widespread concerns about adverse health consequences act as a barrier to adoption and  
50 continued usage of contraceptives.[10 25]  
51  
52  
53  
54  
55  
56

57  
58 Women worldwide have perceptions about menstrual bleeding and what is normal and natural. Participants  
59 perceived a regular menstrual flow as healthy. Similarly, women in Mali and South Africa equated  
60 menstruation with the womb being cleared of 'dirt,' thus allowing good health, so methods that interrupt the



1 natural menstrual pattern were considered unacceptable.[25] Participants associated menstrual irregularities  
2 (e.g. reduced or increased flow) with dangerous outcomes from bloodlessness, weight gain and disease, and  
3 related them causally to the heating effects of contraceptives. Thus, injections were often perceived as the  
4 most heating since they most often led to menstrual irregularities. Several women used nutritional and herbal  
5 remedies to counteract the side-effects of modern medicines such as contraceptives, usually the perceived  
6 heating and weakening effects.[17 18]  
7  
8  
9

10  
11 This exploratory study drew from the experiences of a small sample of twenty women, most of whom had  
12 experience of using some or all of the contraceptives discussed. Data saturation was not attempted due to  
13 time and security concerns. However, findings – particularly regarding the importance of the hot-cold idiom  
14 and menstrual regularity - suggest opportunities for further research.  
15  
16  
17

## 18 19 **CONCLUSIONS**

20 Study findings support existing research on contraceptive usage. Most women wanted family planning, but  
21 were not entirely comfortable with their experiences of contraceptive use. The Pakistan government  
22 implements a nationwide Lady Health Worker Program through the Provincial Health Departments, and a  
23 Family Welfare Worker Program through the Population Welfare Departments of each province. These aim  
24 to provide PHC services including door-to-door family planning counselling and distribution to women in  
25 their homes. A better understanding of women's concerns and explanatory models could provide more  
26 effective service delivery for family planning. Women's concerns regarding family planning side-effects and  
27 resulting health concerns could also inform research and development of contraceptives. Limitations of  
28 today's contraceptive technology are one reason that women are not using, or are uncomfortable with using,  
29 family planning methods. Thus, findings provide explanatory models from women themselves that could,  
30 with further research, inform health messages and family planning counselling, strengthening programmes in  
31 Karachi and potentially elsewhere in Pakistan.  
32  
33  
34  
35  
36  
37  
38  
39

## 40 **ACKNOWLEDGMENTS**

41 Authors thank the women from Shah Faisal Colony who shared their perspectives and experiences. Thanks  
42 to the RLCC health team for their facilitation and support.  
43  
44  
45

## 46 **CONTRIBUTORS**

47 Both authors contributed substantially to study design and data interpretation. KM conceived of the study,  
48 collected data, and drafted the article, with critical input and revision by NH. Both authors approved the final  
49 version before publication.  
50  
51  
52

## 53 **FUNDING**

54 Author salaries and costs were provided by their respective institutions. No additional funding was sought.  
55  
56  
57

## 58 **ETHICAL APPROVAL**

The study was approved by the ethics committee of the London School of Hygiene & Tropical Medicine (LSHTM) in the United Kingdom and the Institutional Review Board of Interactive Research and Development in Pakistan.

## COMPETING INTERESTS

None.

## REFERENCES

1. NIPS. Pakistan Demographic and Health Survey 2006-2007. Islamabad: National Institute of Population Studies, 2007.
2. PCO. Estimated population of Pakistan. Secondary Estimated population of Pakistan 2011.
3. World Bank. Data on annual population growth (%) <http://data.worldbank.org/indicator/SP.POP.GROW> (accessed Dec 2012), 2011.
4. Zafar MI. Husband-wife roles as a correlate of contraceptive and fertility behaviour. Pakistan development review 1996;**35**(2):145-70
5. Mahmood N, Ringheim K. Factors affecting contraceptive use in Pakistan. Pakistan development review 1996;**35**(1):1-22
6. Nasir JA, Hinde A. Factors associated with contraceptive approval among religious leaders in Pakistan. Journal of biosocial science 2011;**43**(5):587-96 doi: 10.1017/S0021932011000216[published Online First: Epub Date].
7. Saleem A, Pasha GR. Women's reproductive autonomy and barriers to contraceptive use in Pakistan. The European journal of contraception & reproductive health care : the official journal of the European Society of Contraception 2008;**13**(1):83-9 doi: 10.1080/01443610701577107[published Online First: Epub Date].
8. GoP. Development Amidst Crisis, Pakistan Millennium Development Goals Report Islamabad: Centre for Poverty Reduction and Social Policy Development, Planning Commission, 2010.
9. Fikree FF, Saleem S, Sami N. A quality of care issue: appropriate use and efficacy knowledge of five contraceptive methods: views of men and women living in low socioeconomic settlements of Karachi, Pakistan. JPMA. The Journal of the Pakistan Medical Association 2005;**55**(9):363-8
10. Casterline JB, Sathar ZA, ul Haque M. Obstacles to contraceptive use in Pakistan: a study in Punjab. Studies in family planning 2001;**32**(2):95-110
11. Javaid U. Corruption and its Deep Impact on Good Governance in Pakistan. Pakistan Economic and Social Review 2010;**48**( 1 (Summer)):123-34
12. Zafar MI, Ford N, Ankomah A. Significance of beliefs and values in predicting fertility and contraceptive behaviour in Pakistan. Journal of biosocial science 1995;**27**(3):301-18
13. Jafarey SN. Maternal mortality in Pakistan--compilation of available data. JPMA. The Journal of the Pakistan Medical Association 2002;**52**(12):539-44
14. Hamid S, Stephenson R. Provider and health facility influences on contraceptive adoption in urban Pakistan. International family planning perspectives 2006;**32**(2):71-8 doi: 10.1363/ifpp.32.071.06[published Online First: Epub Date].
15. Shaikh B. Unmet need for family planning in Pakistan – PDHS 2006–2007: it's time to re-examine déjà vu. Open Access Journal of Contraception 2010;**1**:113-18
16. Carton TW, Agha S. Changes in contraceptive use and method mix in Pakistan: 1990-91 to 2006-07. Health policy and planning 2011 doi: 10.1093/heapol/czr022[published Online First: Epub Date].
17. Shaikh SH, Malik F, James H, Abdul H. Trends in the use of complementary and alternative medicine in Pakistan: a population-based survey. J Altern Complement Med 2009;**15**(5):545-50 doi: 10.1089/acm.2008.0232[published Online First: Epub Date].
18. Shaikh BT, Hatcher J. Complementary and Alternative Medicine in Pakistan: Prospects and Limitations. Evidence-based complementary and alternative medicine : eCAM 2005;**2**(2):139-42 doi: 10.1093/ecam/neh088[published Online First: Epub Date].
19. Nichter M. The layperson's perception of medicine as perspective into the utilization of multiple therapy systems in the Indian context. Social science & medicine. Medical anthropology 1980;**14B**(4):225-33
20. Kleinman A. *Patients and healers in the context of culture: An Exploration of the Borderland Between Anthropology, Medicine, and Psychiatry*: University of California Press, 1980.

- 1 21. Kleinman A. *The Illness Narratives: Suffering, Healing, & The Human Condition*: Basic Books, 1988.
- 2 22. Tolley E, Loza S, Kafafi L, Cummings S. The impact of menstrual side effects on contraceptive
- 3 discontinuation: findings from a longitudinal study in Cairo, Egypt. *International family planning*
- 4 *perspectives* 2005;**31**(1):15-23 doi: 10.1363/ifpp.31.15.05[published Online First: Epub Date].
- 5 23. Godfrey EM, Chin NP, Fielding SL, Fiscella K, Dozier A. Contraceptive methods and use by women
- 6 aged 35 and over: A qualitative study of perspectives. *BMC women's health* 2011;**11**:5 doi:
- 7 10.1186/1472-6874-11-5[published Online First: Epub Date].
- 8 24. Sultana A, Qazilbash A. Factors associated with failure of family planning methods in Pakistan: Burhan
- 9 village case study. Working Paper Series #91. Islamabad: Sustainable Development Policy Institute,
- 10 2004.
- 11 25. Williamson LM, Parkes A, Wight D, Petticrew M, Hart GJ. Limits to modern contraceptive use among
- 12 young women in developing countries: a systematic review of qualitative research. *Reproductive*
- 13 *health* 2009;**6**:3 doi: 10.1186/1742-4755-6-3[published Online First: Epub Date].
- 14 26. Zafar M, Habib-Ullah M, Rehman S, Abbasi S. Fertility regulating behaviour: a study of rural Punjab –
- 15 Pakistan. *Pakistan Journal of Applied Sciences* 2003;**3**(6):376-84
- 16 27. Bhatti MH. Correlates of choice of contraceptive methods in Pakistan. *Pakistan development review*
- 17 1995;**34**(4 Pt. III):889-98
- 18 28. Rajasekar D, Bigrigg A. Pill knowledge amongst oral contraceptive users in family planning clinics in
- 19 Scotland: facts, myths and fantasies. *The European journal of contraception & reproductive health*
- 20 *care : the official journal of the European Society of Contraception* 2000;**5**(1):85-90
- 21 29. Aleem N. Myths and misconceptions about contraceptive methods: An exploratory qualitative study
- 22 amongst married youth of Karachi. Aga Khan University, 2010.
- 23 30. Ali S, Sophie R, Imam AM, et al. Knowledge, perceptions and myths regarding infertility among
- 24 selected adult population in Pakistan: a cross-sectional study. *BMC public health* 2011;**11**:760 doi:
- 25 10.1186/1471-2458-11-760[published Online First: Epub Date].
- 26 31. Harcourt W. Sex, lies and population: a view from the north? . Working Paper Series #3. Islamabad:
- 27 Sustainable Development Policy Institute, 1992.
- 28 32. Spiers J. New perspectives on vulnerability using emic and etic approaches. *Journal of advanced nursing*
- 29 2000;**31**(3):715-21
- 30 33. Scherer RF, Owen CL, Petrick JA, Brodzinski JD, Goyer KA. Initial development of an emic
- 31 methodology for classification of stressful work situations. *Perceptual and motor skills* 1991;**73**(3 Pt
- 32 1):1004-6
- 33 34. Tripp-Reimer T. Reconceptualizing the construct of health: integrating emic and etic perspectives.
- 34 *Research in nursing & health* 1984;**7**(2):101-9
- 35 35. Karachi City Government. Shah Faisal Town (<http://www.karachicity.gov.pk/>). accessed September
- 36 2012: City District Government Karachi, 2011.
- 37 36. Higgins JA, Hirsch JS. Pleasure, power, and inequality: incorporating sexuality into research on
- 38 contraceptive use. *American journal of public health* 2008;**98**(10):1803-13 doi:
- 39 10.2105/AJPH.2007.115790[published Online First: Epub Date].
- 40 37. Smith C. Content Analysis and Narrative Analysis. In: Reis H, Judd C, eds. *Handbook of Research*
- 41 *Methods in Social and Personality Psychology*: Cambridge University Press, 2000.
- 42 38. Kamran I, Arif MS, Vassos K. Concordance and discordance of couples living in a rural Pakistani
- 43 village: perspectives on contraception and abortion--a qualitative study. *Global public health* 2011;**6**
- 44 **Suppl 1**:S38-51 doi: 10.1080/17441692.2011.590814[published Online First: Epub Date].
- 45 39. Kaneshiro B, Aeby T. Long-term safety, efficacy, and patient acceptability of the intrauterine Copper T-
- 46 380A contraceptive device. *International journal of women's health* 2010;**2**:211-20
- 47 40. Pool R. Hot and cold as an explanatory model: the example of Bharuch district in Gujarat, India. *Social*
- 48 *science & medicine* 1987;**25**(4):389-99
- 49 41. Barrett RJ, Lucas RH. Hot and cold in transformation: is Iban medicine humoral? *Social science &*
- 50 *medicine* 1994;**38**(2):383-93
- 51 42. Harwood A. The hot-cold theory of disease. Implications for treatment of Puerto Rican patients. *JAMA :*
- 52 *the journal of the American Medical Association* 1971;**216**(7):1153-8
- 53 43. Hartog J, Hartog EA. Cultural aspects of health and illness behavior in hospitals. *The Western journal of*
- 54 *medicine* 1983;**139**(6):910-6
- 55 44. Hilgert NI, Gil GE. Reproductive medicine in northwest Argentina: traditional and institutional systems.
- 56 *Journal of ethnobiology and ethnomedicine* 2007;**3**:19 doi: 10.1186/1746-4269-3-19[published
- 57 *Online First: Epub Date*].
- 58 45. Singh A. Place of menstruation in the reproductive lives of women of rural North India. *Indian Journal of*
- 59 *Community Medicine* 2006;**31**:10-14
- 60

1 46. Marcos S. Hot and cold classification in traditional Iguape medicine. *Ethnology* 1984;23(1):63-72  
2  
3  
4  
5  
6  
7  
8  
9  
10  
11  
12  
13  
14  
15  
16  
17  
18  
19  
20  
21  
22  
23  
24  
25  
26  
27  
28  
29  
30  
31  
32  
33  
34  
35  
36  
37  
38  
39  
40  
41  
42  
43  
44  
45  
46  
47  
48  
49  
50  
51  
52  
53  
54  
55  
56  
57  
58  
59  
60

For peer review only

FIGURES

Figure 1 Map of Pakistan

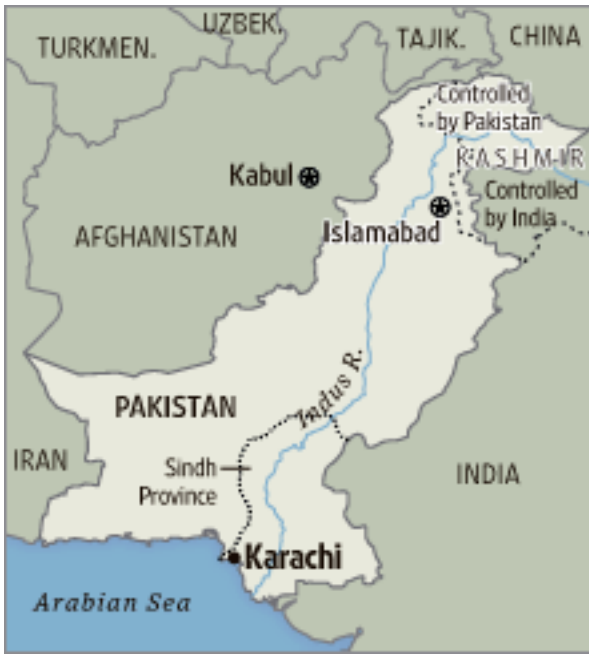

Source: <http://jagonews.com/wp-content/uploads/2010/02/Karachi-map.gif> (accessed 20 April 2013)

Figure 2 Schematic map of Karachi showing the location of Shah Faisal Colony

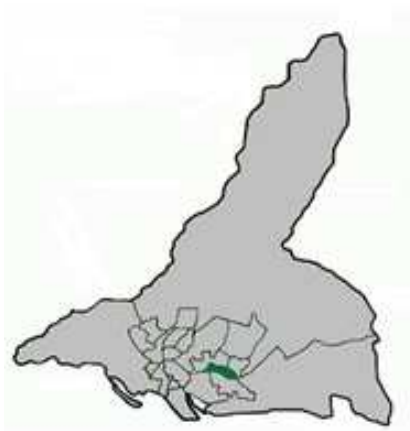

Source: Karachi City Government: [http://en.wikipedia.org/wiki/File:ShahFaisalTown\\_Karachi.PNG](http://en.wikipedia.org/wiki/File:ShahFaisalTown_Karachi.PNG) (accessed 20 April 2013)

1  
2  
3  
4  
5  
6  
7  
8  
9  
10  
11  
12  
13  
14  
15  
16  
17  
18  
19  
20  
21  
22  
23  
24  
25  
26  
27  
28  
29  
30  
31  
32  
33  
34  
35  
36  
37  
38  
39  
40  
41  
42  
43  
44  
45  
46  
47  
48  
49  
50  
51  
52  
53  
54  
55  
56  
57  
58  
59  
60

## OBJECTS OF TEMPORARY CONTRACEPTION: AN EXPLORATORY STUDY OF WOMEN'S PERSPECTIVES IN KARACHI, PAKISTAN

Kamyla Marvi<sup>1</sup> and Natasha Howard<sup>2</sup>

<sup>1</sup> Leadership Development for Mobilising Reproductive Health (LDM), Institute of International Education, Karachi, Pakistan; [kamyla.marvi@gmail.com](mailto:kamyla.marvi@gmail.com)

<sup>2</sup> Department of Global Health and Development, London School of Hygiene and Tropical Medicine (LSHTM), London, UK

### Correspondence to

Natasha Howard, Department of Global Health and Development, Faculty of Public Health and Policy, LSHTM, 15-17 Tavistock Place, London, WC1H 9SH; T: +44 (0)2079272144; F: +44 (0)207436 5389; E: [natasha.howard@lshtm.ac.uk](mailto:natasha.howard@lshtm.ac.uk)

### Key words

Family planning, qualitative research, traditional medicine, Pakistan

**Word count:** 3,824

**ABSTRACT****Objective**

To explore perspectives of three modern contraceptive objects, using an *emic* approach, among women in Shah Faisal Colony, a low-income community in Karachi, Pakistan.

**Methods**

In-depth face-to-face interviews of non-users (n=5), injection users (n=7), pill users (n=4), and IUD users (n=4) were conducted in 2011. Qualitative content analysis with an inductive approach and manual thematic coding was used to analyse data.

**Results**

Awareness of family planning was high. Women described different therapeutic approaches, stating they generally preferred modern medicine for contraception as it was fastest and most powerful. They reported that fear of some contraceptive objects, particularly injections and IUDs, influenced their choices. Women explained their perceptions of how the heating effects of contraceptives could cause unwanted side-effects including menstrual irregularities, weight gain, and weakness, leading to disease.

**Conclusions**

Most women wanted family planning, but remained dissatisfied with available contraceptives and their effects. While women reported that they relied on modern medicine for contraception, their descriptions of how contraceptives affected their health relied on the hot-cold explanatory idiom of traditional medicine.

**Article focus**

- To explore women's understanding and interpretations of three modern contraceptives.

**Key messages**

- Women were knowledgeable about family planning and relied on modern contraceptives.
- Contraceptive potency and effects were interpreted using the hot-cold idiom of traditional medicine.
- Consideration of women's interpretive idioms could help providers improve health messages and family planning counselling.

**Study strengths and limitations**

- Use of qualitative methods provided rich insight into women's interpretations and decision-making regarding contraceptives.
- Available time and funding constrained the sample size, limiting inclusion of a potentially broader range of perspectives.

## INTRODUCTION

Pakistan, the world's sixth most populous country, has an estimated population of 176 million.[1 2] Annual population growth of 2.1% resulted in the population quadrupling in the past fifty years with 41% below age fifteen.[1 3] Potential reasons are both demand-side (e.g. female autonomy, religious beliefs, son preference [4-7]) and supply-side (e.g. cost, poor distribution, and limited coverage of contraceptives [8-10]). A rise in political and religious extremism since the dictatorship of Zia ul Haq (1977-88), Pakistan's subsequent involvement in the international 'war on terror,' poor governance, and resulting from rampant corruption have weakened the economy, worsening social indicators.[11] High population growth strains Pakistan's limited resources, affecting health indicators. For example, with reproductive-age women constituting almost one-quarter of Pakistan's total population, a low contraceptive prevalence rate (CPR) of 29.6%, with much lower rates among poor and rural populations, contributes to a high maternal mortality ratio of 260/100,000 - mostly preventable haemorrhage, eclampsia, and sepsis.[1 5 12 13]

Pakistan has had a population programme since the 1960s and family planning awareness is nearly universal, with 96% of women surveyed identifying at least one modern contraceptive method.[1 14] While modern contraceptives comprise 73% of Pakistan's CPR, temporary methods allowing birth spacing (e.g. pills, IUDs, injectables, implants, condoms) comprise 13.6% of current usage, of which half (6.8%) are condoms.[1] Thus, only a small proportion of Pakistani couples use temporary methods with evidence suggesting a significant unmet need for contraception (Table 1).[1 15 16]

**Table 1** Percentage% mMethod usage among married women aged 15-49 in Pakistan

| Method                                   | Current usage | Ever used | Residence  |            | Education  |                     |            | Wealth Quintile |            |            |            |            |
|------------------------------------------|---------------|-----------|------------|------------|------------|---------------------|------------|-----------------|------------|------------|------------|------------|
|                                          |               |           | Urban      | Rural      | Illiterate | Primary / Secondary | Higher     | 1               | 2          | 3          | 4          | 5          |
| Hormonal pill                            | 2.1           | 12.2      | <u>2.6</u> | <u>1.8</u> | <u>2.0</u> | <u>2.0</u>          | <u>2.9</u> | <u>1.5</u>      | <u>1.8</u> | <u>1.9</u> | <u>2.6</u> | <u>2.4</u> |
| Injectable contraceptive                 | 2.3           | 11.1      | <u>2.3</u> | <u>2.3</u> | <u>2.1</u> | <u>2.9</u>          | <u>1.1</u> | <u>1.6</u>      | <u>2.5</u> | <u>3.2</u> | <u>2.7</u> | <u>1.6</u> |
| Intra-uterine contraceptive device (IUD) | 2.3           | 8         | <u>2.6</u> | <u>2.1</u> | <u>1.9</u> | <u>2.6</u>          | <u>4.5</u> | <u>1.0</u>      | <u>1.5</u> | <u>2.8</u> | <u>1.7</u> | <u>4.8</u> |

Source: [1]

Pakistan is a predominantly Muslim society with formal, informal, and popular healthcare approaches coexisting. Pakistan's formal medical system includes modern (i.e. Western) medicine, westernised homeopathy, and traditional *hikmat*. *Hikmat* or *unani tibb* is traditional Greco-Arab medicine, widely practiced in Pakistan, with similarities to Indian *Ayurvedic* medicine. Modern medicine is the most common approach in urban settings and government facilities, but overlaps with traditional and folk approaches.[17 18] Shaikh and colleagues found health providers often presented false qualifications or interpreted modern medicine to suit patient beliefs.[17] While contraceptives are modern medicine, popular perceptions and practices are influenced by religion and other therapeutic approaches.[12 18] Nichter noted that multiple therapy systems coexist in most countries, despite the regulatory efforts of government or vested interests of



1 dominant therapy systems.[19] Kleinman classified the professional, traditional, and popular as three  
2 overlapping systems, while Nichter found providers underappreciated the ways popular ideas about medicine  
3 influenced healthcare seeking and compliance.[19-21]  
4

5  
6 Women's perceptions of contraceptives significantly influence their decisions to start or continue family  
7 planning in Pakistan, supporting recent global discourse on influences of side-effects on usage.[22-26] Bhatti  
8 and colleagues found 12.1% of non-users cited method-related reasons, including fear of side-effects and  
9 interference with normal bodily processes.[1 27] Sultana and colleagues found a 29% discontinuation rate for  
10 female methods in Punjab was primarily due to side-effects, as contraceptive users associated all subsequent  
11 health problems (e.g. obesity, body aches, high blood pressure, nausea, irregular bleeding, infertility) with  
12 contraceptive usage.[24]  
13

14  
15  
16  
17  
18  
19 Most studies approach contraceptive behaviour from medical or behavioural perspectives, with minimal  
20 consideration of the contraceptive objects used.[28] Such approaches can result in women's perspectives  
21 being minimised as misconceptions.[29 30] Little research has explored the explanatory models Pakistani  
22 women apply to their contraceptive beliefs.[29] The term 'misconception' already implies these beliefs are  
23 flawed, and that the alternative medical model provides the correct explanation. However, these beliefs are  
24 entrenched in age-old belief systems and experiences that are real and personal to women and those around  
25 them. Nishtar found these beliefs to be based on societal perceptions, which women considered must have  
26 some basis in truth to be so widespread.[29] Multiple sources of perception create the basis on which each  
27 woman makes decisions.[31] The objects used for temporary contraception have their own potency to affect  
28 the body's functioning, perceptions of which influence usage decisions (e.g. whether, which, how long?).  
29 Little *emic* data, showing behaviour or beliefs in culturally meaningful terms, connects popular perceptions  
30 of contraception to usage.[32 33]  
31  
32  
33  
34  
35  
36  
37  
38

39 This study examined perceptions of modern contraceptive objects, using an *emic* perspective, among women  
40 in a low-income community of Karachi, Pakistan.[34] The research question was 'What are these women's  
41 beliefs about contraceptive objects and do those beliefs affect usage decisions?' It contributes to the literature  
42 on unmet need by describing how popular perceptions affect usage. Study objectives were to:  
43

- 44 • describe women's perceptions of three temporary contraceptives as objects (i.e. injections, pills, IUDs);
- 45 • consider how women's perceptions of contraceptive usage and potency within their own therapeutic  
46 paradigms affected usage decisions.  
47  
48  
49

## 50 51 **METHODS**

52  
53  
54 Ethics approval was granted by the LSHTM research ethics committee in the United Kingdom and the  
55 Institutional Review Board of Interactive Research and Development in Pakistan.  
56  
57  
58  
59  
60

1 With approximately 18 million inhabitants, Karachi is the commercial, industrial and financial hub of  
2 Pakistan (Figure 1).[35] Shah Faisal Colony (Figure 2), with a population of over 335,000, has experienced  
3 violent civil clashes. It was chosen for its ethnic diversity and low socioeconomic level. A local non-  
4 governmental organisation, Rana Liaquat Craftsman Colony (RLCC), provided a community entry point,  
5 facilitating access with women. RLCC has provided basic clinic services in Shah Faisal Colony since 1954,  
6 providing services to approximately 5,400 families. [Women living in the study site have access to](#)  
7 [contraceptives through door-to-door distribution of condoms and pills, and clinical access to IUDs and](#)  
8 [injectables through NGO workers. Contraceptives were sold for Pakistani Rupees 1 \(US\\$0.01\) per condom,](#)  
9 [Pakistani Rupees 10 \(US\\$0.10\) for oral pills, Pakistani Rupees 100 \(US\\$1.0\) for 3-month injectables, and](#)  
10 [Pakistani Rupees 300 \(US\\$3.0\) for IUD insertion.](#)

11 In-depth face-to-face interviews were chosen to explore women's experiences and perceptions. Twenty  
12 participants were purposively sampled, for diversity of opinion, from [the population of](#) non-menopausal  
13 married women over age 20, living in Shah Faisal Colony, Karachi. [No other inclusion and exclusion criteria](#)  
14 [were used. Researchers aimed](#) for:

- 15 • 5 non-users of contraception;
- 16 • 5 injectable contraceptive users (1, 2 or 3-month dosage);
- 17 • 5 oral pill users;
- 18 • 5 IUD users.

19 Participants were recruited by RLCC outreach workers, trained for one day in qualitative recruitment  
20 methods, who distributed study information sheets and obtained written informed consent from all [literate](#)  
21 potential participants. [Verbal consent was taken from illiterate participants after reading out and discussing](#)  
22 [information sheet and consent form with them.](#) The lead author was responsible for final participant  
23 selection, [reconfirmation of consent](#) and conducting interviews in a private room at the RLCC health centre.  
24 Two pilot interviews were conducted to finalise the interview guide. The guide ensured themes of interest  
25 were covered, though interviews were conducted as loosely guided conversations to allow women control in  
26 defining topics. Interviews were digitally recorded with participant permission and took approximately one  
27 hour. Recordings were given a pseudonym to ensure confidentiality, which was also recorded on the consent  
28 form and kept in a locked file. Observations were recorded for each interview.

29 Interviews were transcribed in Urdu, translated into English, and typed into Microsoft Word by a  
30 professional transcriptionist and translator familiar with reproductive health terminology. Translations were  
31 checked by the interviewer, and participants where possible, to ensure accuracy. Transcripts were labelled by  
32 pseudonym and numbered by page and line.

33 Following principles of interpretive social research, the interviewer conducted initial analysis to increase  
34 interpretability and deepen understanding of social and emotional context.[36] Qualitative content analysis  
35 with manual thematic coding was used, with an inductive approach to building non-hierarchical themes and  
36

identifying meaning.[37] Consensus was reached between authors on differences found. Data was triangulated by comparing responses to similar questions in different transcript sections.

## FINDINGS

Twenty-one interviews were conducted. One, unrecorded, was excluded. Of 20 participants (Table 2), six were illiterate and others educated to secondary level, with two completing matriculation after grade 10 and five completing intermediate certification after grade 12. Most (i.e. 13 women) were housewives, three did piecework embroidery at home, and a few had outside jobs (e.g. domestic work, teaching, one actress). Half of husbands (i.e. 11) worked in low-income jobs (e.g. street merchants), six were semi-skilled or skilled labourers (e.g. electrician, driver, barber), while two husbands were unemployed. Women were of various ethnicities, including three Pathans, five Muhajir, and seven Punjabis. All were Muslim and most had resided in the area since childhood (7) or marriage (11). Participants averaged 31 years old (25-45 years), were married and still menstruating. Non-users were on average 10 years older than contraceptive users (38 versus 28). All had children, ranging from seven months to 25 years old. Participants had an average of three children each (range 1-10). Non-users had fewer male children on average, at 0.80 male and 2.6 female versus 1.5 male and 1.6 female for contraceptive users. Of the fifteen contraceptive users, seven used injectable contraceptives, four used contraceptive pills, and four used an IUD. Thirteen contraceptive users cited the expense of raising children as their primary reason for birth spacing, while two cited previous pregnancy complications.

**Table 2** Participant demographics, ordered by contraceptive usage and age

| Pseudonym   | Usage               | Age   | Education     | Origin  | Living children |   |
|-------------|---------------------|-------|---------------|---------|-----------------|---|
|             |                     |       |               |         | M               | F |
| Ayesha      | Non User            |       | Grade 9       | Haripur | 2               | 1 |
| Nadira      | Non User            | 31    | Intermediate  | Pindi   | 0               | 2 |
| Kaukab      | Non User (pregnant) | 37    | Grade 5       | Abbasi  | 0               | 4 |
| Rashida     | Non User            | 40    | Grade 9       | -       | 0               | 5 |
| Aziza       | Non User            | 45    | Matriculation | Muhajir | 2               | 1 |
| Karima      | Injection           | 25    | Grade 8       | Punjabi | 1               | 0 |
| Sofia       | Injection           | 25-26 | Grade 8       | -       | 1               | 2 |
| Farida Bibi | Injection           | 28    | Intermediate  | -       | 1               | 0 |
| Rehmat      | Injection           | 28    | Intermediate  | Muhajir | 2               | 0 |
| Talat       | Injection           | 28    | Illiterate    | Punjabi | 0               | 4 |
| Gul Zehra   | Injection           | 33    | Illiterate    | Pathan  | 2               | 8 |
| Nasreen     | Injection           | 35    | Matriculation | Punjabi | 2               | 1 |
| Misbah      | Pills               |       | Illiterate    | Pathan  | 1               | 1 |
| Qamar       | Pills               | 23    | Grade 8       | Punjabi | 1               | 1 |
| Pari        | Pills               | 28    | Illiterate    | Punjabi | 2               | 2 |

|         |       |     |              |         |   |   |
|---------|-------|-----|--------------|---------|---|---|
| Insiya  | Pills | 28  | Intermediate | -       | 2 | 1 |
| Shazia  | IUD   |     | Illiterate   | Punjabi | 1 | 1 |
| Mariam  | IUD   | <30 | Illiterate   | Pathan  | 1 | 2 |
| Shaista | IUD   | 30  | Intermediate | Muhajir | 2 | 1 |
| Shehnaz | IUD   | 31  | Grade 8      | Muhajir | 3 | 1 |

NB: Education in Pakistan is organised into primary (grades 1-5); middle (grades 6-8); high (grades 9-10, culminating in matriculation); intermediate (grades 11-12, culminating in intermediate diploma).

Emergent themes are organised under therapeutic systems, contraceptives as objects, and potency and side-effects.

### Therapeutic systems

All women discussed multiple therapeutic systems, including doctors practicing through private and government services, lady health workers, traditional birth attendants, homeopaths, *hakeems*, and practitioners offering healing prayers.[17] Most women used home remedies and explored different systems with varying success:

*Talat: "Yes we have tried all. We have had prayers done; we have taken medicines from doctors, and hakeems too. Some are good and effective."*

*Nadira: "For example, a complete treatment for jaundice does not exist in modern medicine, which simply advises to take more water and juices; but homeopathy has the treatment for this."*

Women preferred the speed and power of modern treatments:

*Talat: "Most of the time we take medicines from doctors [because] we get relief more quickly. Children get better. Rather than taking remedies we more often take medicine from outside so that the children can be comfortable more quickly. They shouldn't suffer."*

*Rehmat: "The difference is that the homeopathic impact is very late, and allopathic modern medicine, such as injections etc., has an immediate effect... A person recovers immediately."*

*Farida Bibi: "Very few people go to a Hakeem; and those that do are elderly. I mean to say, those who, because of their age are unable to use the medicines of a doctor as they are of greater power, they go to a Hakeem."*

Women used home remedies or modern services for reproductive issues. Most chose delivery in hospitals or maternity clinics, with only four reporting giving birth with the help of a *dai* or traditional birth attendant. Nineteen of twenty participants expressed eagerness to space their children. Non-users spoke of birth spacing through breast-feeding or other natural methods, with one woman using withdrawal. Participants were not asked about birth limiting versus birth spacing. All women preferred modern contraceptives, and knew of no methods emerging from alternative therapy systems.

## Contraceptives as objects

Women were shown injectable contraceptives, pills, and IUDs during interviews to elicit their perceptions.

All were familiar with injections as objects, as Pakistani practitioners commonly overprescribe them.[38]

Women expressed different levels of fear, from mild to much stronger discomfort:

*Rehmat: "The [contraceptive] injection hurts so much that I get shaken up, although I try to control myself. She says to leave the body loose, but when an injection is going inside, how I can leave it loose? My leg becomes numb. She says 'I don't know - this doesn't happen with anyone else, just you...'"*

Some women said injections generally were a more powerful and faster way of delivering medicine to the body.

*Rehmat: "When we eat medicine, it affects after a while. Injections effect immediately, they mix with the blood quickly."*

Most women said contraceptive pills were easy to use, some suggesting they were mild or weak because they were small and needed to be taken daily.

*Insiya: "These are so small. One doesn't even feel that one has taken something."*

One woman explicitly related size to potency:

*Ayesha: "Due to size they may have greater potency, the ones that are large-sized..."*

*Interviewer: "And this one that is small? (pointing to contraceptive pills)"*

*Ayesha: "It may be of lesser potency."*

Women expressed greatest fear of IUDs. Vaginal insertion already brings a sense of discomfort within the cultural milieu of Muslim women. Many who commented were less familiar with IUDs, and several expressed hesitation about inserting a foreign object into the body.

*Insiya: "When I went to get injected they showed me the IUD, that either I should use the injection or the IUD, but the mere sight of it appeared to be something dangerous"*

Several worried it would hurt their husbands:

*Shazia: "Yes, he experiences inconvenience. It is that wire-like thing, it sticks to him. He scolds me, 'Why did you get this done?' Later on he becomes normal. He says it is all right."*

Several expressed concern about potential risks from IUD materials:

*Misbah: "Plastic and flesh are different, it will do some harm."*

*Interviewer: "This is plastic, that's why it will cause problems?"*

*Misbah: "Yes, it's plastic. That's why it causes some problem or another."*

*Interviewer: "What problem?"*

*Misbah: "I don't know, but I don't find it good."*

1  
2  
3  
4  
5  
6  
7  
8  
9  
10  
11  
12  
13  
14  
15  
16  
17  
18  
19  
20  
21  
22  
23  
24  
25  
26  
27  
28  
29  
30  
31  
32  
33  
34  
35  
36  
37  
38  
39  
40  
41  
42  
43  
44  
45  
46  
47  
48  
49  
50  
51  
52  
53  
54  
55  
56  
57  
58  
59  
60

*Shaista: "Now copper is kept inside the wet body and something keeps on releasing from it. This is what people say. People used to tell me that it is rust and when it rusts from inside it will produce fungus inside the uterus and obviously fungus will be converted into cancer and many people complain of cancer."*

### Potency and side-effects

#### Colour

Most stated that an object's colour did not affect its potency but helped with identification. A few noted that lighter colours meant the medicine was gentler.

*Shaista: "Obviously light colour medicines are more suitable and better, you might have seen that iron syrups are darker in colour and they have a different taste. When you drink it you will feel that you have eaten iron. It emits a smell like iron and does not suit us."*

#### Heat

Nearly all discussed medicinal potency and effect on their wellbeing in terms of heating (*garam taseer*) and cooling (*thandi taseer*) properties. Participants considered modern medicine heat generating and other therapies less so.

*Farida Bibi: "One hears that the medicines of the Hakeem are herbal and they are cooling. Even if these medicines do not bring relief, they do not cause harm."*

All women identified contraceptives as 'heating,' with pills and injections particularly, considered more heating than other modern medicines:

*Ayesha: "These things generate heat into one's body; one feels upset. If I take a tablet I feel uneasy and my heart pounds."*

*Interviewer: "What is its effect?"*

*Qamar: "It is hot..."*

*Interviewer: "Are all tablets hot?"*

*Qamar: "Some are hotter than others."*

*Interviewer: "Do you think these [contraceptives] are hotter or cooler?"*

*Qamar: "Yes, these are hotter."*

Women described the heating effect of contraceptives as resulting in, or further accentuating, irregular or excessive menstruation, weakness, and weight gain. Most said contraceptive heat resulted in excess bleeding.

*Shehnaz: "I got it [IUD] placed that's why I have more flow of menstruation; that happens with everyone."*

Several equally interpreted missed menstruation as heat damage, discussing herbal remedies to encourage the onset of delayed menstruation:

*Nasreen: "Obviously, they [contraceptive injections] are heat-generating. They may be burning the blood."*

*Interviewer: "What do you mean by burning the blood as you cannot see the process?"*

1 *Nasreen: "Just what elder women say; girls take injections; the blood gets burned; there is no*  
2 *menstruation."*

3  
4  
5 Others focused on weakness and swelling.

6 *Pari: "If a woman is weak she shouldn't take it. I know how difficult it is for me. She won't tolerate it well.*  
7 *She will be so tired from taking pills. They are very hot and because they are hot they will rot your blood.*  
8 *You will feel unwell."*

9  
10  
11  
12 *Nadira: "I was not like I am today. There is more swelling in my body. When one takes more medicines, I*  
13 *think it harms the body."*

14 *Interviewer: "You are saying that it is due to hot medicines?"*

15 *Nadira: "Yes it is due to heat."*

## 16 17 18 19 20 Menstruation

21 A regular flow of menstruation was considered normal and healthy by all women. Women associated  
22 irregular bleeding with weakness, weight gain, and disease. Women associated menstrual irregularities with  
23 all three contraceptives, but those using injectables complained most:

24  
25  
26 *Nasreen: "I stopped taking [\[contraceptive\]](#) injections; I say that the flow of menstruation is also essential."*  
27

28  
29  
30 Most reported menstruation as a form of cleansing. If it did not occur regularly then weight gain or serious  
31 disease could follow:

32 *Farida Bibi: "I too fear that my periods may stop and that my abdomen starts bulging."*

33  
34  
35 *Nasreen: "They say that if menstruation stops it causes internal diseases. Tumours are formed, obviously, if*  
36 *something dirty doesn't find its way out."*

37  
38  
39  
40 Women associated both excessive and insufficient menstruation with weakness. Perspectives varied as to  
41 whether weakness caused irregular bleeding or vice versa.

42 *Farida Bibi: "Some have excessive menses; they have it twice a month; as a result of which one gets weaker.*  
43 *For example, in our home there is my elder sister-in-law; it [IUD] did not suit her. She goes through*  
44 *excessive menstruation, even more than before. She is getting weaker day by day."*

45  
46  
47  
48  
49 *Talat: "When it used to come every month it was ok. Now it is every 2-3 months. Then sometimes it is scanty*  
50 *and sometimes it is heavy."*

51 *Interviewer: "How does that affect a woman?"*

52 *Talat: "It causes weakness. When women menstruate, then weakness is relieved."*

## 53 54 55 56 57 Long-term effects

1 Women's perspectives were mixed whether long-term or repeated usage of contraception was harmful.  
2 Some, who felt comfortable with their method of contraception, said that extended usage of five to ten years  
3 was harmless:  
4

5 *Ayesha: "What effect would it be? No, nothing..."*

6 *Interviewer: "Nothing?"*

7 *Ayesha: "It depends on you. You should take care of yourself."*  
8  
9

10  
11 Others were concerned about blood pressure, infertility, uterine damage, obesity, and 'problems with the  
12 blood'. The most common concern was temporary infertility:  
13

14 *Talat: "You won't get pregnant. When the effect of medicine finishes in the body, then pregnancy occurs. My  
15 niece had the injection. When she left the injection, a year or so after, when the effect of the medicine  
16 finished, she conceived."*  
17  
18

19  
20 *Nasreen: "If you use something in routine you should give a gap in between..."*

21 *Interviewer: "So if I desire child spacing of five years and if I use injections continuously?"*

22 *Nasreen: "No, don't do that!"*

23 *Interviewer: "What is the risk involved in that?"*

24 *Nasreen: "The risk is that the menstruation will stop altogether."*

25 *Interviewer: "So is that risky?"*

26 *Nasreen: "Yes, that is dangerous!"*  
27  
28  
29  
30  
31

32  
33 One participant stated that prolonged usage of medicines reduces efficacy:

34 *Rashida: "Anything stops having an effect. If you continuously use a medicine its effect finishes."*  
35  
36

### 37 Suitability

38 While women said all medicines are heat generating, they clarified that the extent to which heating effects  
39 were felt depended on the person's blood. People have hot or cold blood, which reacts to hot or cold foods  
40 and medicines. Hot-blooded people were described as more sensitive to heat, getting rashes and being  
41 irritable by nature:  
42  
43

44 *Aziza: "Yes. It [blood] is hot or cold, depending on the person's body makeup. We practice remedies by  
45 ourselves... for decreasing the heat of the body."*  
46  
47  
48

49 Women discussed how contraceptives 'suit' or do not suit an individual. Many tried one method then  
50 switched to another because it did not suit them. Women understood each person to be different, and that  
51 each method had different effects on different people:  
52  
53

54 *Pari: "Everyone says that the tube [IUD] suits some people and is better, but others whom it does not suit, it  
55 causes damage."*  
56  
57  
58  
59  
60



1 | Qamar: "If it suits a woman, then they keep taking. And there are some women, like me, the [\[contraceptive\]](#)  
2 | injection harmed me, so I left it. Like these pills now suit me, in the same way there are some women whom  
3 | the injection suits. Then they keep using the injection."  
4 |

5 |  
6 | Women discussed how, after some time, negative effects of medicines could wear off and suit them better.  
7 |

## 8 | 9 | **DISCUSSION**

10 |  
11 | Participants were familiar with the strengths and weaknesses of multiple therapeutic approaches, and moved  
12 | easily between them depending on the nature of the problem and whether the initial approach was considered  
13 | effective. Women generally preferred modern approaches as providing more powerful and rapid results - and  
14 | as the only choice for fertility control - but expressed concerns about long-term effects. Concepts of  
15 | medicinal potency reflected those in other studies. For example, Nichter reports that Indian villagers  
16 | perceived that modern medicine offered a quick cure but eventually harmed overall health.[19]  
17 |

18 |  
19 | The contraceptive as object was meaningful for women. Particularly meaningful were fear of injection pain  
20 | and discomfort about IUD ~~insertion~~[usage](#), both affecting contraceptive choices.[36 39] Despite preferring  
21 | modern contraception, women used traditional medicine idioms to explain contraceptive objects and how  
22 | these worked within their bodies. Women's perceptions of how contraceptives affected their health were  
23 | grounded in the hot-cold explanatory idiom.[40] This idiom of the heating and cooling effects of food and  
24 | medicine, combined with an individual's hot or cold blood, is found in many traditional health approaches  
25 | including Chinese, North Indian, and South American.[41-46] The hot-cold concept is rooted in Hippocratic  
26 | humoral medicine that spread via Arab influence.[43] Nichter describes Western medicines as heating and  
27 | ayurvedic medicines as neutral, in reference to the speed and uncontrolled manner in which the former acts  
28 | and perceived effect on the blood.[19]  
29 |

30 |  
31 | In Pakistan, the hot-cold idiom is an essential component of *hikmat*. Although *hikmat* was not a preferred  
32 | therapeutic approach for participants, this idiom was [essential to their understanding of the effects of](#)  
33 | [contraceptives on their bodies and why individuals reacted differently](#). Women reported menstrual  
34 | irregularities, weight gain and weakness as the main interconnected problems caused by the heating  
35 | properties of contraceptives. While no other literature from Pakistan was found relating women's perceptions  
36 | of contraception to this idiom, it was overwhelmingly part of participants' vocabulary. Weakness from  
37 | already heated blood could be further aggravated by the heating effects of contraceptives. Women spoke of  
38 | discontinuing or changing methods because of such side effects, supporting Casterline and others'  
39 | conclusion that widespread concerns about adverse health consequences act as a barrier to adoption and  
40 | continued usage of contraceptives.[10 25]  
41 |

42 |  
43 | Women worldwide have perceptions about menstrual bleeding and what is normal and natural. Participants  
44 | perceived a regular menstrual flow as healthy. Similarly, women in Mali and South Africa equated  
45 | menstruation with the womb being cleared of 'dirt,' thus allowing good health, so methods that interrupt the  
46 |

1 natural menstrual pattern were considered unacceptable.[25] Participants associated menstrual irregularities  
2 (e.g. reduced or increased flow) with dangerous outcomes from bloodlessness, weight gain and disease, and  
3 related them causally to the heating effects of contraceptives. Thus, injections were often perceived as the  
4 most heating since they most often led to menstrual irregularities. Several women used nutritional and herbal  
5 remedies to counteract the side-effects of modern medicines such as contraceptives, usually the perceived  
6 heating and weakening effects.[17 18]  
7  
8  
9

10  
11 This exploratory study drew from the experiences of a small sample of twenty women, most of whom had  
12 experience of using some or all of the contraceptives discussed. Data saturation was not attempted due to  
13 time and security concerns. However, findings – particularly regarding the importance of the hot-cold idiom  
14 and menstrual regularity - suggest opportunities for further research.  
15  
16  
17

## 18 CONCLUSIONS

19 Study findings support existing research on contraceptive usage. Most women wanted family planning, but  
20 were not entirely comfortable with their experiences of contraceptive use. [The Pakistan government](#)  
21 [implements a nationwide Lady Health Worker Program through the Provincial Health Departments, and a](#)  
22 [Family Welfare Worker Program through the Population Welfare Departments of each province. These aim](#)  
23 [to provide PHC services including door-to-door family planning counselling and distribution to women in](#)  
24 [their homes. A better understanding of women's concerns and ~~their explanatory models of explanation could~~](#)  
25 [serve to provide more effective service delivery for family planning. Women's concerns regarding family](#)  
26 [planning side-effects and resulting health concerns could also inform research and development of](#)  
27 [contraceptives. Limitations of today's contraceptive technology ~~in itself are one of the reasons that women~~](#)  
28 [are not using, or are uncomfortable with using, family planning methods. Thus, findings provide](#)  
29 explanatory models from women themselves that could, with further research, inform health messages and  
30 family planning counselling, strengthening programmes in Karachi and potentially elsewhere in Pakistan.  
31  
32  
33  
34  
35  
36  
37  
38  
39

## 40 ACKNOWLEDGMENTS

41 Authors thank the women from Shah Faisal Colony who shared their perspectives and experiences. Thanks  
42 to the RLCC health team for their facilitation and support.  
43  
44  
45

## 46 CONTRIBUTORS

47 Both authors contributed substantially to study design and data interpretation. KM conceived of the study,  
48 collected data, and drafted the article, with critical input and revision by NH. Both authors approved the final  
49 version before publication.  
50  
51  
52

## 53 FUNDING

54 Author salaries and costs were provided by their respective institutions. No additional funding was sought.  
55  
56  
57

## 58 ETHICAL APPROVAL

The study was approved by the ethics committee of the London School of Hygiene & Tropical Medicine (LSHTM) in the United Kingdom and the Institutional Review Board of Interactive Research and Development in Pakistan.

## COMPETING INTERESTS

None.

## REFERENCES

1. NIPS. Pakistan Demographic and Health Survey 2006-2007. Islamabad: National Institute of Population Studies, 2007.
2. PCO. Estimated population of Pakistan. Secondary Estimated population of Pakistan 2011.
3. World Bank. Data on annual population growth (%) <http://data.worldbank.org/indicator/SP.POP.GROW> (accessed Dec 2012), 2011.
4. Zafar MI. Husband-wife roles as a correlate of contraceptive and fertility behaviour. Pakistan development review 1996;**35**(2):145-70
5. Mahmood N, Ringheim K. Factors affecting contraceptive use in Pakistan. Pakistan development review 1996;**35**(1):1-22
6. Nasir JA, Hinde A. Factors associated with contraceptive approval among religious leaders in Pakistan. Journal of biosocial science 2011;**43**(5):587-96 doi: 10.1017/S0021932011000216[published Online First: Epub Date].
7. Saleem A, Pasha GR. Women's reproductive autonomy and barriers to contraceptive use in Pakistan. The European journal of contraception & reproductive health care : the official journal of the European Society of Contraception 2008;**13**(1):83-9 doi: 10.1080/01443610701577107[published Online First: Epub Date].
8. GoP. Development Amidst Crisis, Pakistan Millennium Development Goals Report Islamabad: Centre for Poverty Reduction and Social Policy Development, Planning Commission, 2010.
9. Fikree FF, Saleem S, Sami N. A quality of care issue: appropriate use and efficacy knowledge of five contraceptive methods: views of men and women living in low socioeconomic settlements of Karachi, Pakistan. JPMA. The Journal of the Pakistan Medical Association 2005;**55**(9):363-8
10. Casterline JB, Sathar ZA, ul Haque M. Obstacles to contraceptive use in Pakistan: a study in Punjab. Studies in family planning 2001;**32**(2):95-110
11. Javaid U. Corruption and its Deep Impact on Good Governance in Pakistan. Pakistan Economic and Social Review 2010;**48**( 1 (Summer)):123-34
12. Zafar MI, Ford N, Ankomah A. Significance of beliefs and values in predicting fertility and contraceptive behaviour in Pakistan. Journal of biosocial science 1995;**27**(3):301-18
13. Jafarey SN. Maternal mortality in Pakistan--compilation of available data. JPMA. The Journal of the Pakistan Medical Association 2002;**52**(12):539-44
14. Hamid S, Stephenson R. Provider and health facility influences on contraceptive adoption in urban Pakistan. International family planning perspectives 2006;**32**(2):71-8 doi: 10.1363/ifpp.32.071.06[published Online First: Epub Date].
15. Shaikh B. Unmet need for family planning in Pakistan – PDHS 2006–2007: it's time to re-examine déjà vu. Open Access Journal of Contraception 2010;**1**:113-18
16. Carton TW, Agha S. Changes in contraceptive use and method mix in Pakistan: 1990-91 to 2006-07. Health policy and planning 2011 doi: 10.1093/heapol/czr022[published Online First: Epub Date].
17. Shaikh SH, Malik F, James H, Abdul H. Trends in the use of complementary and alternative medicine in Pakistan: a population-based survey. J Altern Complement Med 2009;**15**(5):545-50 doi: 10.1089/acm.2008.0232[published Online First: Epub Date].
18. Shaikh BT, Hatcher J. Complementary and Alternative Medicine in Pakistan: Prospects and Limitations. Evidence-based complementary and alternative medicine : eCAM 2005;**2**(2):139-42 doi: 10.1093/ecam/neh088[published Online First: Epub Date].
19. Nichter M. The layperson's perception of medicine as perspective into the utilization of multiple therapy systems in the Indian context. Social science & medicine. Medical anthropology 1980;**14B**(4):225-33
20. Kleinman A. *Patients and healers in the context of culture: An Exploration of the Borderland Between Anthropology, Medicine, and Psychiatry*. University of California Press, 1980.

- 1 21. Kleinman A. *The Illness Narratives: Suffering, Healing, & The Human Condition*: Basic Books, 1988.
- 2 22. Tolley E, Loza S, Kafafi L, Cummings S. The impact of menstrual side effects on contraceptive  
3 discontinuation: findings from a longitudinal study in Cairo, Egypt. *International family planning*  
4 *perspectives* 2005;**31**(1):15-23 doi: 10.1363/ifpp.31.15.05[published Online First: Epub Date]].
- 5 23. Godfrey EM, Chin NP, Fielding SL, Fiscella K, Dozier A. Contraceptive methods and use by women  
6 aged 35 and over: A qualitative study of perspectives. *BMC women's health* 2011;**11**:5 doi:  
7 10.1186/1472-6874-11-5[published Online First: Epub Date]].
- 8 24. Sultana A, Qazilbash A. Factors associated with failure of family planning methods in Pakistan: Burhan  
9 village case study. Working Paper Series #91. Islamabad: Sustainable Development Policy Institute,  
10 2004.
- 11 25. Williamson LM, Parkes A, Wight D, Petticrew M, Hart GJ. Limits to modern contraceptive use among  
12 young women in developing countries: a systematic review of qualitative research. *Reproductive*  
13 *health* 2009;**6**:3 doi: 10.1186/1742-4755-6-3[published Online First: Epub Date]].
- 14 26. Zafar M, Habib-Ullah M, Rehman S, Abbasi S. Fertility regulating behaviour: a study of rural Punjab –  
15 Pakistan. *Pakistan Journal of Applied Sciences* 2003;**3**(6):376-84
- 16 27. Bhatti MH. Correlates of choice of contraceptive methods in Pakistan. *Pakistan development review*  
17 1995;**34**(4 Pt. III):889-98
- 18 28. Rajasekar D, Bigrigg A. Pill knowledge amongst oral contraceptive users in family planning clinics in  
19 Scotland: facts, myths and fantasies. *The European journal of contraception & reproductive health*  
20 *care : the official journal of the European Society of Contraception* 2000;**5**(1):85-90
- 21 29. Aleem N. Myths and misconceptions about contraceptive methods: An exploratory qualitative study  
22 amongst married youth of Karachi. Aga Khan University, 2010.
- 23 30. Ali S, Sophie R, Imam AM, et al. Knowledge, perceptions and myths regarding infertility among  
24 selected adult population in Pakistan: a cross-sectional study. *BMC public health* 2011;**11**:760 doi:  
25 10.1186/1471-2458-11-760[published Online First: Epub Date]].
- 26 31. Harcourt W. Sex, lies and population: a view from the north? . Working Paper Series #3. Islamabad:  
27 Sustainable Development Policy Institute, 1992.
- 28 32. Spiers J. New perspectives on vulnerability using emic and etic approaches. *Journal of advanced nursing*  
29 2000;**31**(3):715-21
- 30 33. Scherer RF, Owen CL, Petrick JA, Brodzinski JD, Goyer KA. Initial development of an emic  
31 methodology for classification of stressful work situations. *Perceptual and motor skills* 1991;**73**(3 Pt  
32 1):1004-6
- 33 34. Tripp-Reimer T. Reconceptualizing the construct of health: integrating emic and etic perspectives.  
34 *Research in nursing & health* 1984;**7**(2):101-9
- 35 35. Karachi City Government. Shah Faisal Town (<http://www.karachicity.gov.pk/>). accessed September  
36 2012: City District Government Karachi, 2011.
- 37 36. Higgins JA, Hirsch JS. Pleasure, power, and inequality: incorporating sexuality into research on  
38 contraceptive use. *American journal of public health* 2008;**98**(10):1803-13 doi:  
39 10.2105/AJPH.2007.115790[published Online First: Epub Date]].
- 40 37. Smith C. Content Analysis and Narrative Analysis. In: Reis H, Judd C, eds. *Handbook of Research*  
41 *Methods in Social and Personality Psychology*: Cambridge University Press, 2000.
- 42 38. Kamran I, Arif MS, Vassos K. Concordance and discordance of couples living in a rural Pakistani  
43 village: perspectives on contraception and abortion--a qualitative study. *Global public health* 2011;**6**  
44 **Suppl 1**:S38-51 doi: 10.1080/17441692.2011.590814[published Online First: Epub Date]].
- 45 39. Kaneshiro B, Aeby T. Long-term safety, efficacy, and patient acceptability of the intrauterine Copper T-  
46 380A contraceptive device. *International journal of women's health* 2010;**2**:211-20
- 47 40. Pool R. Hot and cold as an explanatory model: the example of Bharuch district in Gujarat, India. *Social*  
48 *science & medicine* 1987;**25**(4):389-99
- 49 41. Barrett RJ, Lucas RH. Hot and cold in transformation: is Iban medicine humoral? *Social science &*  
50 *medicine* 1994;**38**(2):383-93
- 51 42. Harwood A. The hot-cold theory of disease. Implications for treatment of Puerto Rican patients. *JAMA :*  
52 *the journal of the American Medical Association* 1971;**216**(7):1153-8
- 53 43. Hartog J, Hartog EA. Cultural aspects of health and illness behavior in hospitals. *The Western journal of*  
54 *medicine* 1983;**139**(6):910-6
- 55 44. Hilgert NI, Gil GE. Reproductive medicine in northwest Argentina: traditional and institutional systems.  
56 *Journal of ethnobiology and ethnomedicine* 2007;**3**:19 doi: 10.1186/1746-4269-3-19[published  
57 Online First: Epub Date]].
- 58 45. Singh A. Place of menstruation in the reproductive lives of women of rural North India. *Indian Journal of*  
59 *Community Medicine* 2006;**31**:10-14
- 60

46. Marcos S. Hot and cold classification in traditional Iguape medicine. *Ethnology* 1984;23(1):63-72

1  
2  
3  
4  
5  
6  
7  
8  
9  
10  
11  
12  
13  
14  
15  
16  
17  
18  
19  
20  
21  
22  
23  
24  
25  
26  
27  
28  
29  
30  
31  
32  
33  
34  
35  
36  
37  
38  
39  
40  
41  
42  
43  
44  
45  
46  
47  
48  
49  
50  
51  
52  
53  
54  
55  
56  
57  
58  
59  
60

For peer review only

## FIGURES

**Figure 1** Map of Pakistan

Source: <http://jagonews.com/wp-content/uploads/2010/02/Karachi-map.gif> (accessed 20 April 2013)

**Figure 2** Schematic map of Karachi showing the location of Shah Faisal Colony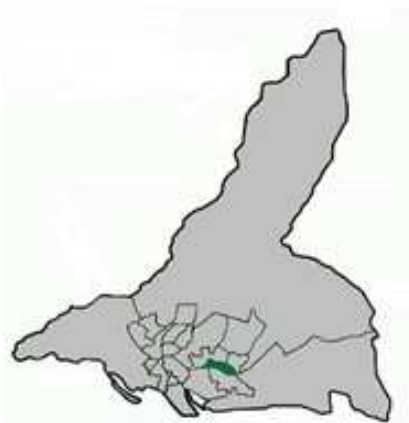

Source: Karachi City Government: [http://en.wikipedia.org/wiki/File:ShahFaisalTown\\_Karachi.PNG](http://en.wikipedia.org/wiki/File:ShahFaisalTown_Karachi.PNG) (accessed 20 April 2013)

## COREQ Checklist[1] for Marvi and Howard

| Nb.                                   | Item                                  | Responses                                                                                                                                                                                                                   |
|---------------------------------------|---------------------------------------|-----------------------------------------------------------------------------------------------------------------------------------------------------------------------------------------------------------------------------|
| <b>Domain 1:</b>                      |                                       | <b>Research team and reflexivity</b>                                                                                                                                                                                        |
| <i>Personal characteristics</i>       |                                       |                                                                                                                                                                                                                             |
| 1                                     | Interviewer                           | The first author conducted all interviews.                                                                                                                                                                                  |
| 2                                     | Credentials                           | At the time of this study, the first author was an experienced NGO manager, completing an MSc in Public Health. The second author was an early-career academic, completing a doctorate in public health.                    |
| 3                                     | Occupation                            | The first author was country manager of a health leadership training NGO. The second author was a lecturer in global health policy.                                                                                         |
| 4                                     | Gender                                | Both authors were female.                                                                                                                                                                                                   |
| 5                                     | Experience/Training                   | Both authors had received masters-level training in qualitative study design, data collection, and analysis methods prior to the start of research. The second author had experience of conducting qualitative research.    |
| <i>Relationship with participants</i> |                                       |                                                                                                                                                                                                                             |
| 6                                     | Relationship established              | The authors had no prior relationship with participants.                                                                                                                                                                    |
| 7                                     | Participant knowledge of interviewer  | Participants were informed about the interviewer's professional background, that she was conducting research as part of an MSc project and would seek to publish findings, and were given the opportunity to ask questions. |
| 8                                     | Interviewer characteristics           | The interviewer was an experienced health professional, particularly interested in the research topic to help improve understanding of women's perspectives among reproductive health leadership trainees.                  |
| <b>Domain 2:</b>                      |                                       | <b>Study design</b>                                                                                                                                                                                                         |
| <i>Theoretical framework</i>          |                                       |                                                                                                                                                                                                                             |
| 9                                     | Methodological orientation and theory | Content analysis                                                                                                                                                                                                            |
| <i>Participant selection</i>          |                                       |                                                                                                                                                                                                                             |
| 10                                    | Sampling                              | Participants were selected purposively to provide a range of contraceptive users and non-users.                                                                                                                             |
| 11                                    | Method of approach                    | Participants were approached face-to-face.                                                                                                                                                                                  |
| 12                                    | Sample size                           | 20 participants.                                                                                                                                                                                                            |
| 13                                    | Non-participation                     | All women selected participated. Two pilot interviews were excluded. One interview was excluded and replaced, as it had not been recorded.                                                                                  |
| <i>Setting</i>                        |                                       |                                                                                                                                                                                                                             |
| 14                                    | Data collection setting               | Data was collected in a private meeting room at a local clinic.                                                                                                                                                             |
| 15                                    | Presence of non-participants          | Non-participants were not present during interviews.                                                                                                                                                                        |
| 16                                    | Description of sample                 | Participants were women living in a low-income district of Karachi, within the RLCC catchment.                                                                                                                              |
| <i>Data collection</i>                |                                       |                                                                                                                                                                                                                             |
| 17                                    | Interview guide                       | An interview guide was developed and piloted.                                                                                                                                                                               |
| 18                                    | Repeat interviews                     | Repeat interviews were not conducted.                                                                                                                                                                                       |
| 19                                    | Audio/Visual recording                | Digital audio recording used.                                                                                                                                                                                               |
| 20                                    | Field notes                           | Field notes were made during or immediately after each interview.                                                                                                                                                           |
| 21                                    | Duration                              | Interviews lasted an average of 60 minutes.                                                                                                                                                                                 |
| 22                                    | Data saturation                       | Data saturation was discussed.                                                                                                                                                                                              |
| 23                                    | Transcripts returned                  | Transcripts were returned where possible to confirm accuracy.                                                                                                                                                               |
| <b>Domain 3:</b>                      |                                       | <b>Data analysis and findings</b>                                                                                                                                                                                           |
| <i>Data analysis</i>                  |                                       |                                                                                                                                                                                                                             |
| 24                                    | Number of data coders                 | Both authors were involved in coding.                                                                                                                                                                                       |
| 25                                    | Description of coding tree            | Coding was non-hierarchical.                                                                                                                                                                                                |
| 26                                    | Derivation of themes                  | Themes were derived from the data.                                                                                                                                                                                          |
| 27                                    | Software                              | Software was not used.                                                                                                                                                                                                      |
| 28                                    | Participant checking                  | It was not possible to contact participants for their feedback on analysis.                                                                                                                                                 |
| <i>Reporting</i>                      |                                       |                                                                                                                                                                                                                             |

|    |                              |                                                     |
|----|------------------------------|-----------------------------------------------------|
| 29 | Quotations presented         | Quotations were presented, identified by pseudonym. |
| 30 | Data and findings consistent | Data and findings presented were consistent.        |
| 31 | Clarity of major themes      | Major themes were presented in findings.            |
| 32 | Clarity of minor themes      | Diverse cases and minor themes were discussed.      |

1. Tong A, Sainsbury P, Craig J. Consolidated criteria for reporting qualitative research (COREQ): a 32-item checklist for interviews and focus groups. *International journal for quality in health care : journal of the International Society for Quality in Health Care / ISQua* 2007;**19**(6):349-57 doi: 10.1093/intqhc/mzm042[published Online First: Epub Date]].

For peer review only
